# Supplementary material
Source: publisher figshare collection journal article supplement (https://acs.figshare.com/ndownloader/files/8061863)
Supplement: Supplementary file 1 [file 8061863]

## SUPPORTING INFORMATION

### **1,1'-BIFUNCTIONAL AMINOPHOSPHANE COMPLEXES VIA N-H BOND INSERTIONS OF A LI/CL PHOSPHINIDENOID COMPLEX AND FIRST STUDIES ON N/P MONO FUNCTIONALIZATIONS**

Rainer Streubel,\* Alexander Schmer, Andreas W. Kyri and Gregor Schnakenburg

Institut für Anorganische Chemie, Rheinische Friedrich-Wilhelms-Universität Bonn, Gerhard-Domagk-Straße 1, 53121 Bonn, Germany

#### **Content**

|                                                          |         |
|----------------------------------------------------------|---------|
| 1. NMR spectra and crystal structure data for <b>3</b>   | S2-S3   |
| 2. NMR spectra and crystal structure data for <b>4</b>   | S4-S5   |
| 3. NMR spectra and crystal structure data for <b>5</b>   | S6-S7   |
| 4. NMR spectra and crystal structure data for <b>6</b>   | S8-S9   |
| 5. NMR spectra and crystal structure data for <b>7</b>   | S10-S11 |
| 6. NMR spectra and crystal structure data for <b>8</b>   | S12-S13 |
| 7. NMR spectra and crystal structure data for <b>9</b>   | S14-S15 |
| 8. NMR spectra and crystal structure data for <b>10</b>  | S16-S17 |
| 9. NMR spectra for <b>12</b>                             | S18-S19 |
| 10. NMR spectra for <b>13</b>                            | S20-S21 |
| 11. NMR spectra and crystal structure data for <b>14</b> | S22-S23 |
| 12. NMR spectra and crystal structure data for <b>17</b> | S24-S25 |
| 13. NMR spectra and crystal structure data for <b>19</b> | S26-S27 |

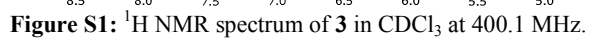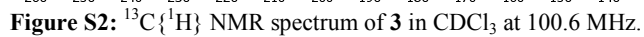

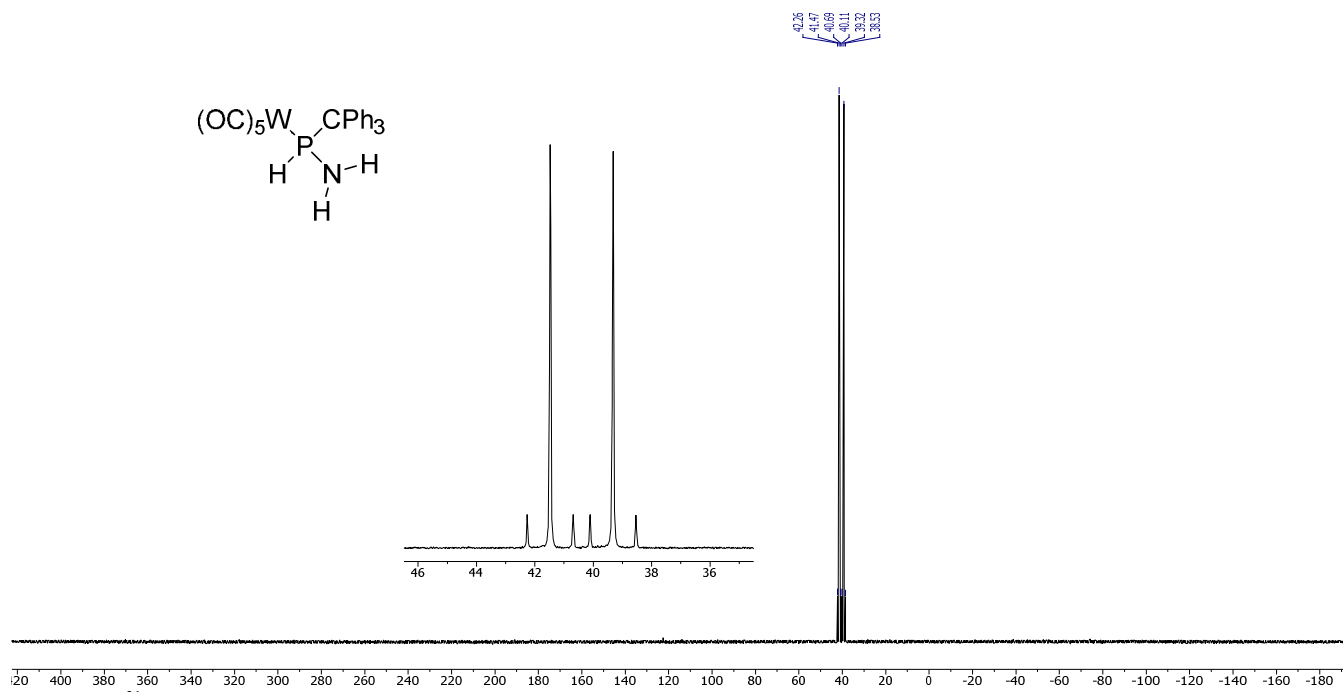

**Figure S3:**  $^{31}\text{P}$  NMR spectrum of **3** in  $\text{CDCl}_3$  at 162.0 MHz.

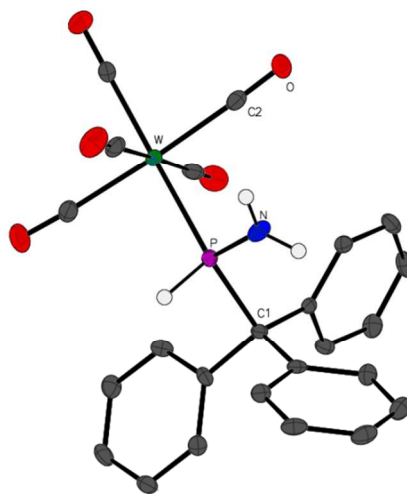

**Figure S4:** Crystal structure of **3**. Suitable single-crystals of **3** were obtained from a concentrated diethyl ether solution at 4 °C. Data were collected with a Bruker X8-KappaApexII diffractometer equipped with a low-temperature device at 100 K by using graphite-monochromated Mo  $K\alpha$  radiation ( $\lambda = 0.71073 \text{ \AA}$ ). The structure was solved by intrinsic phasing methods (SHELXT 2015) and refined by full-matrix least squares on  $F^2$  (SHELXL 2015)<sup>1</sup>:  $\text{C}_{24}\text{H}_{18}\text{NO}_5\text{PW}$ ,  $M_r = 615.21$ , crystal dimensions  $0.22 \times 0.08 \times 0.04 \text{ mm}^3$ , monoclinic, space group  $P2_1/c$ ,  $Z = 4$ ,  $a = 7.2639(9) \text{ \AA}$ ,  $b = 16.750(2) \text{ \AA}$ ,  $c = 18.608(2) \text{ \AA}$ ,  $\alpha = 90^\circ$ ,  $\beta = 98.941(4)^\circ$ ,  $\gamma = 90^\circ$ ,  $V = 2236.6(5) \text{ \AA}^3$ ,  $d_{\text{calcd}} = 1.827 \text{ g cm}^{-3}$ ,  $\mu = 5.272 \text{ mm}^{-1}$ , transmission factors (min/max) 0.3194/0.7459, empirical absorption correction,  $2\theta_{\text{max}} = 55.996^\circ$ , no. of unique data 5339,  $R_{\text{int}} = 0.06$ ,  $R_1$  (for  $I > 2\sigma(I)$ ) = 0.0250,  $wR_2$  (for all data) = 0.0637, final  $R_1 = 0.0306$ , goodness of fit 1.029,  $\Delta F$  (max/min) = 2.21 / -1.34  $e \text{ \AA}^{-3}$ . CCDC 1529744 contains the supplementary crystallographic data for this paper. The data can be obtained free of charge from The Cambridge Crystallographic Data Centre via [www.ccdc.cam.ac.uk/structures](http://www.ccdc.cam.ac.uk/structures).

<sup>1</sup> Sheldrick, G.M. (2015). Acta Cryst. C71, 3-8.

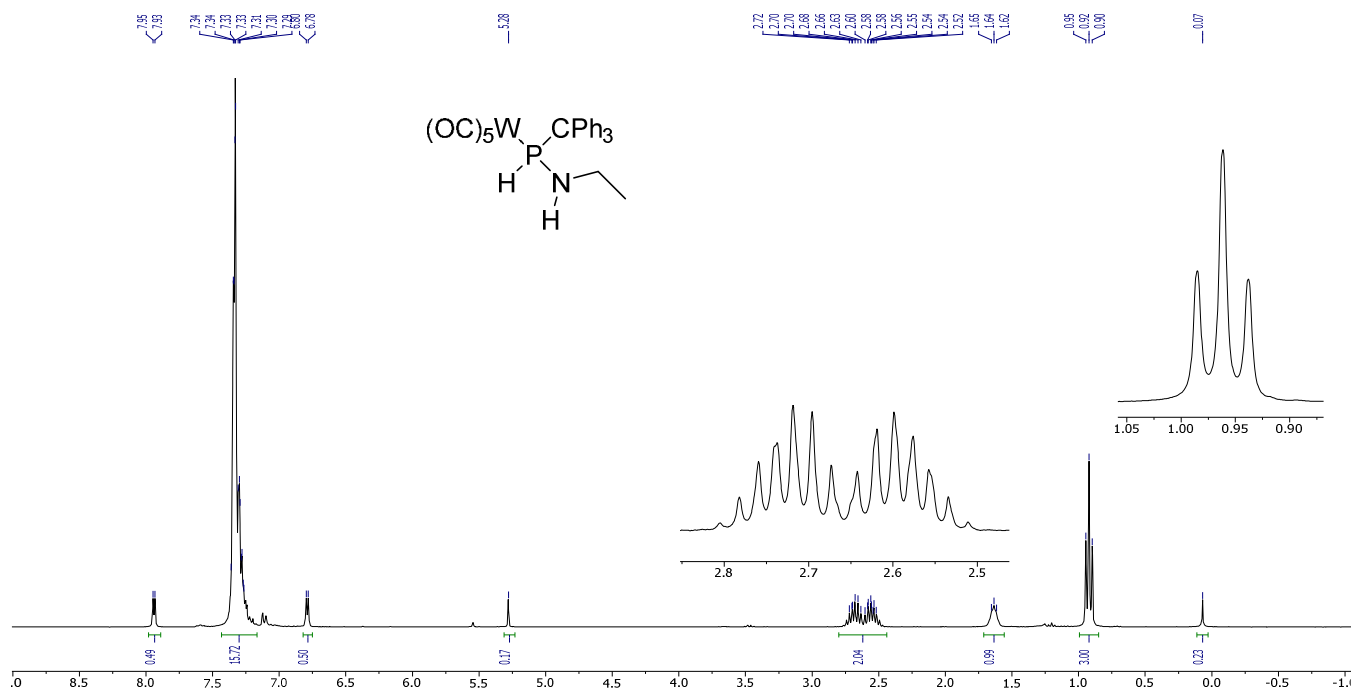

Figure S5:  $^1H$  NMR spectrum of **4** in  $CDCl_3$  at 300.1 MHz.

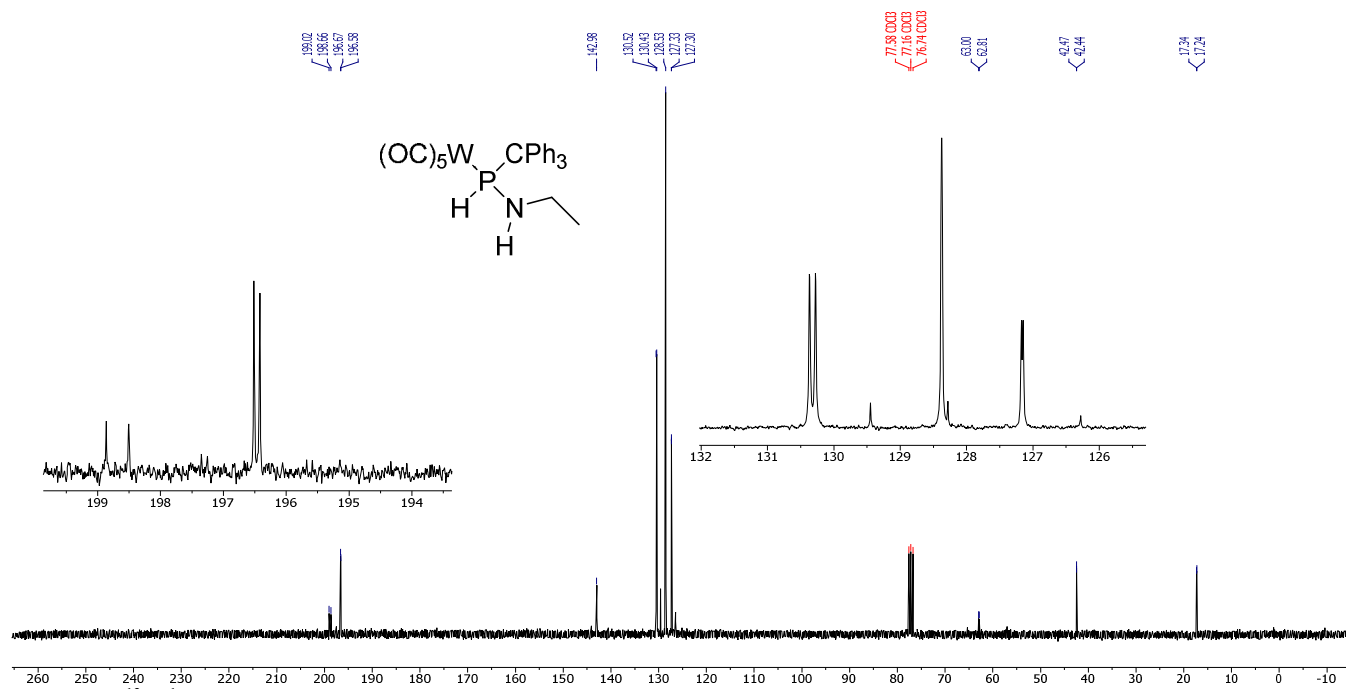

Figure S6:  $^{13}C\{^1H\}$  NMR spectrum of **4** in  $CDCl_3$  at 75.5 MHz.

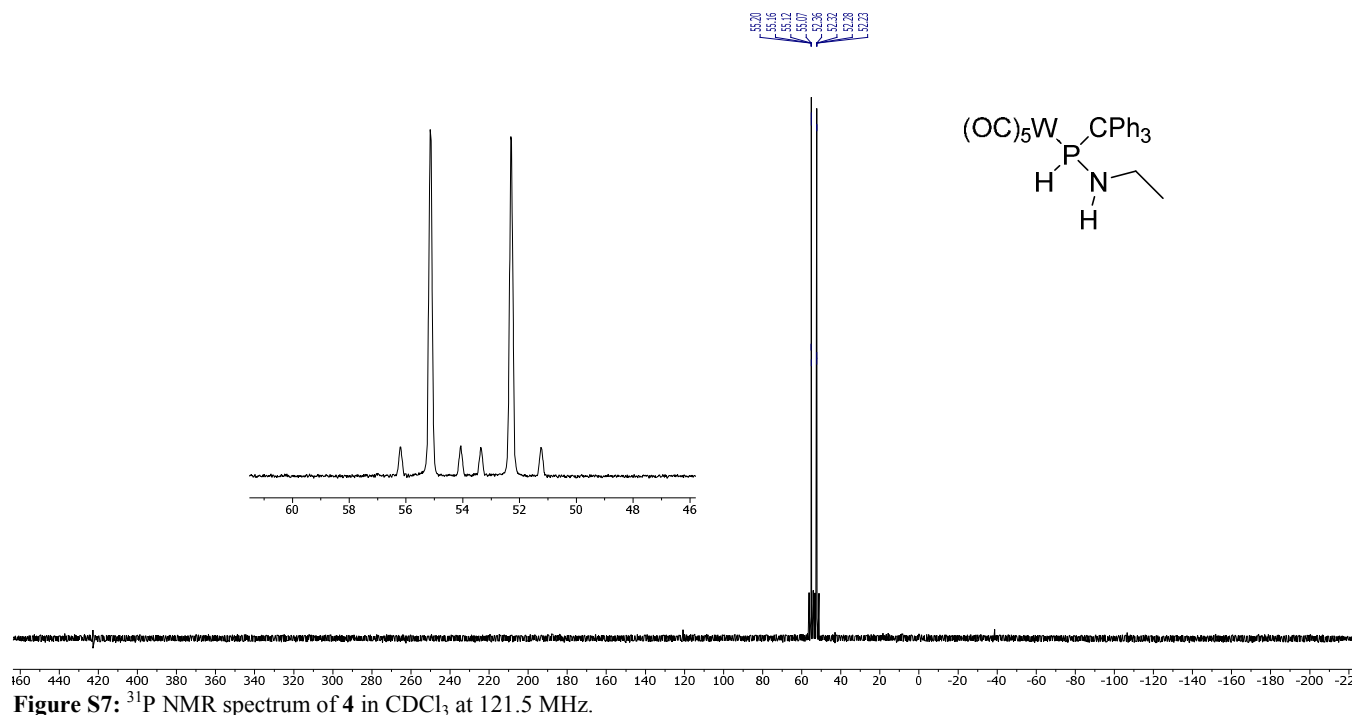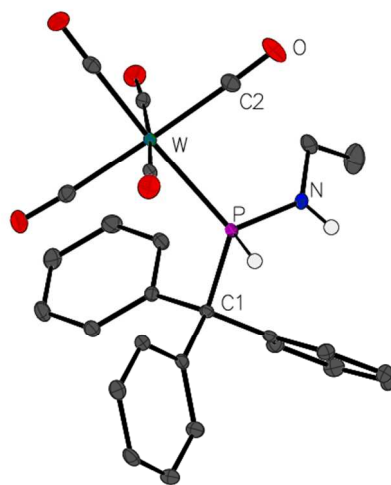

**Figure S8:** Crystal structure of **4**. Suitable single-crystals of **4** were obtained from a concentrated diethyl ether solution at 4 °C. Data were collected with a Bruker D8-Venture diffractometer equipped with a low-temperature device at 100 K by using graphite-monochromated Mo K $\alpha$  radiation ( $\lambda = 0.71073 \text{ \AA}$ ). The structure was solved by intrinsic phasing methods (SHELXT 2015)<sup>1</sup>:  $\text{C}_{26}\text{H}_{22}\text{NO}_5\text{PW}$ , Mr = 643.26, crystal dimensions  $0.24 \times 0.18 \times 0.16 \text{ mm}^3$ , monoclinic, space group C2/c, Z = 8, a = 11.1776(4)  $\text{\AA}$ , b = 11.1777(4)  $\text{\AA}$ , c = 19.2814(7)  $\text{\AA}$ ,  $\alpha = 90^\circ$ ,  $\beta = 95.4332(13)^\circ$ ,  $\gamma = 90^\circ$ , V = 2398.19(15)  $\text{\AA}^3$ ,  $d_{\text{calcd}} = 1.782 \text{ g cm}^{-3}$ ,  $\mu = 4.921 \text{ mm}^{-1}$ , transmission factors (min/max) 0.3579/0.7459, empirical absorption correction,  $2\theta_{\text{max}} = 55.998^\circ$ , no. of unique data 5774,  $R_{\text{int}} = 0.0421$ ,  $R_1$  (for  $I > 2\sigma(I)$ ) = 0.0180,  $wR_2$  (for all data) = 0.0460, final  $R_1 = 0.0203$ , goodness of fit 1.078,  $\Delta F$  (max/min) = 0.53 / -2.49  $\text{e \AA}^{-3}$ . CCDC 1529740 contains the supplementary crystallographic data for this paper. The data can be obtained free of charge from The Cambridge Crystallographic Data Centre via [www.ccdc.cam.ac.uk/structures](http://www.ccdc.cam.ac.uk/structures).

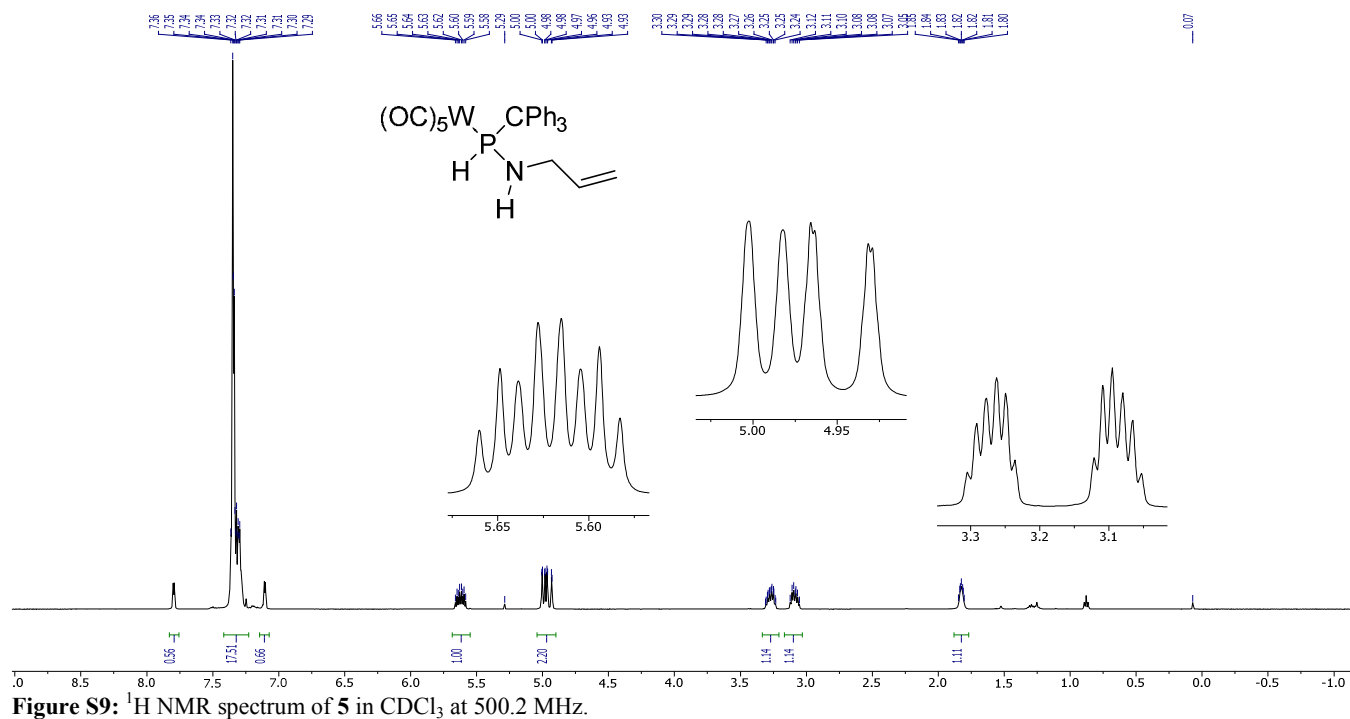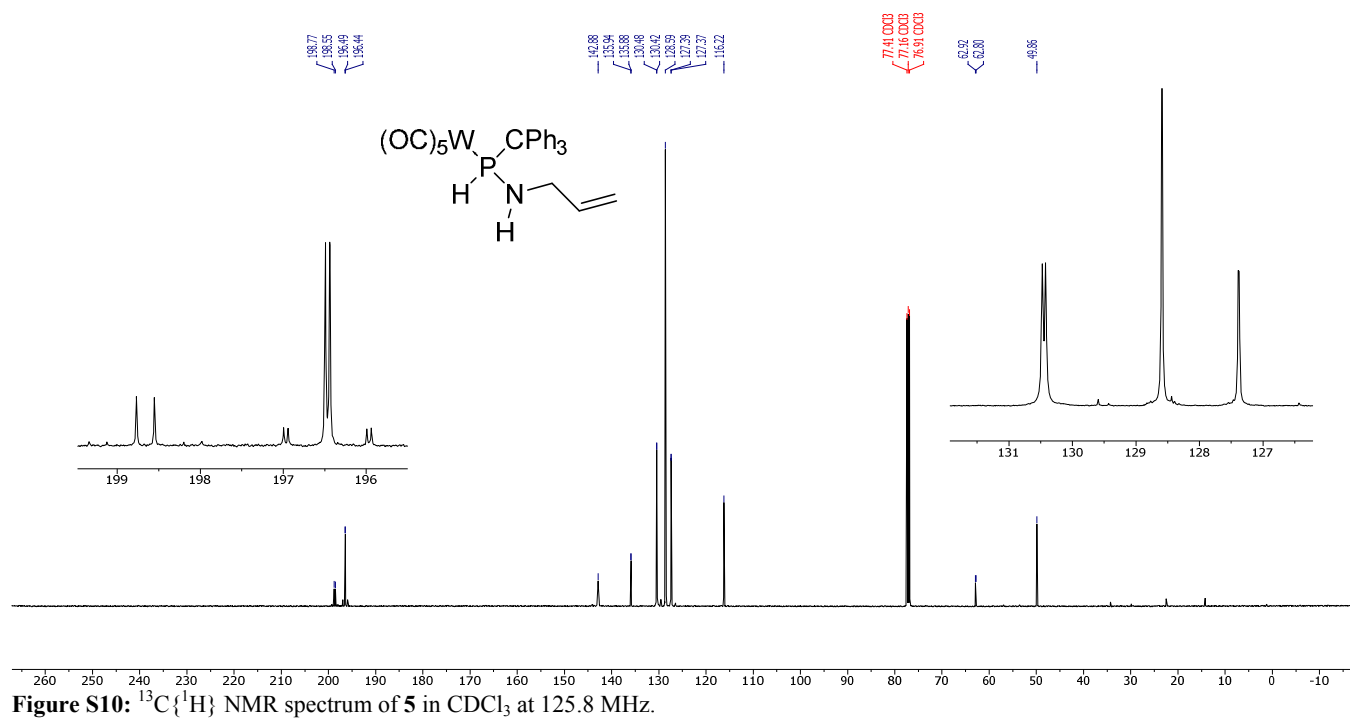



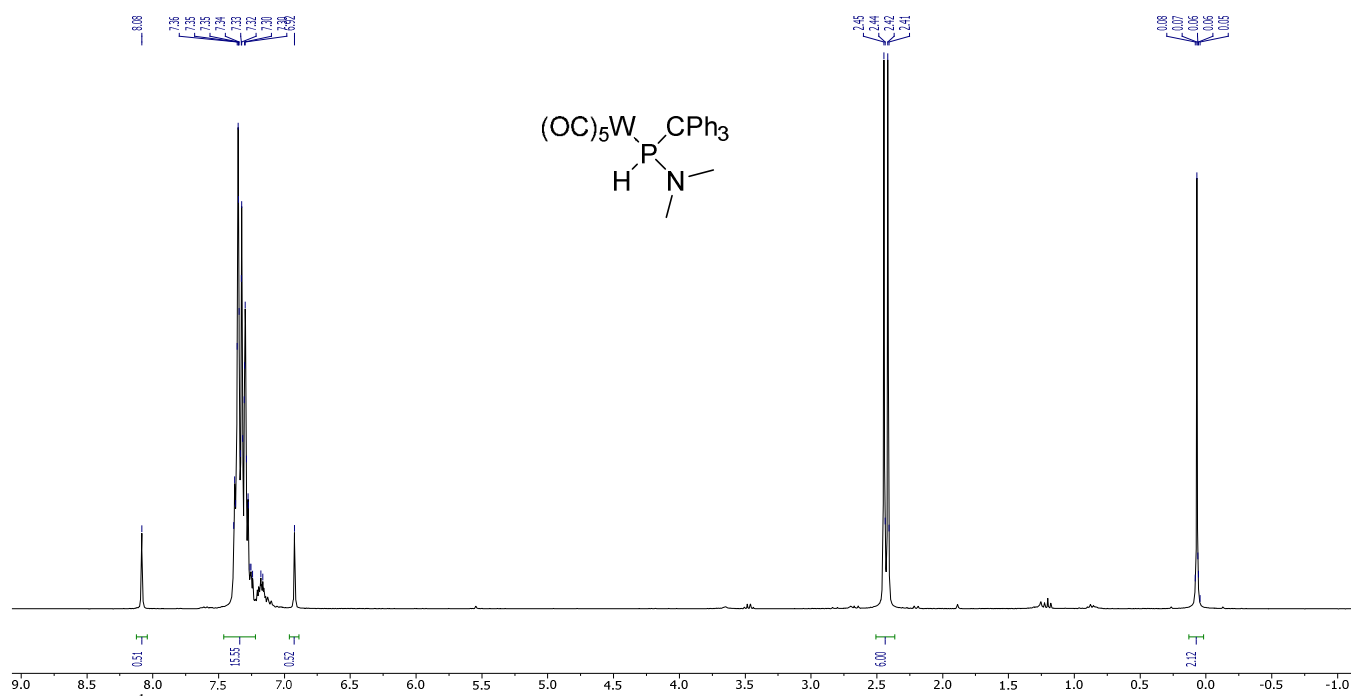

**Figure S13:**  $^1H$  NMR spectrum of **6** in  $CDCl_3$  at 300.1 MHz.

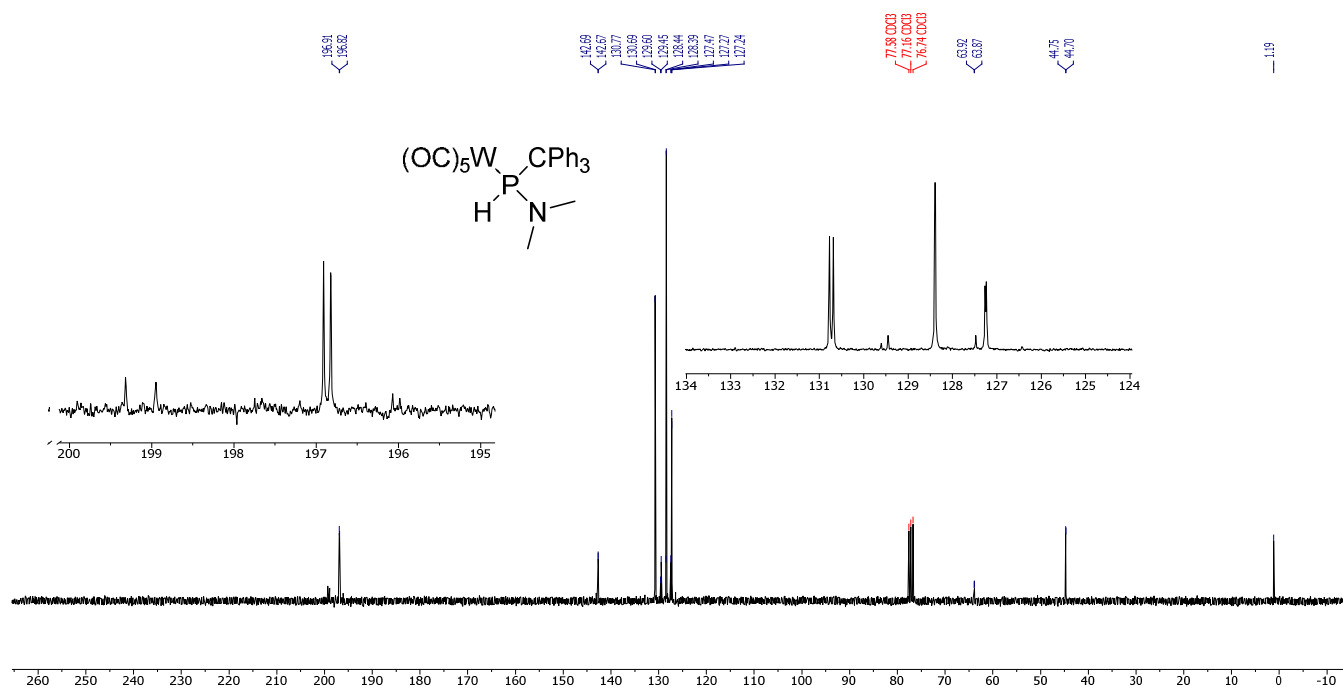

**Figure S14:**  $^{13}C\{^1H\}$  NMR spectrum of **6** in  $CDCl_3$  at 75.5 MHz.



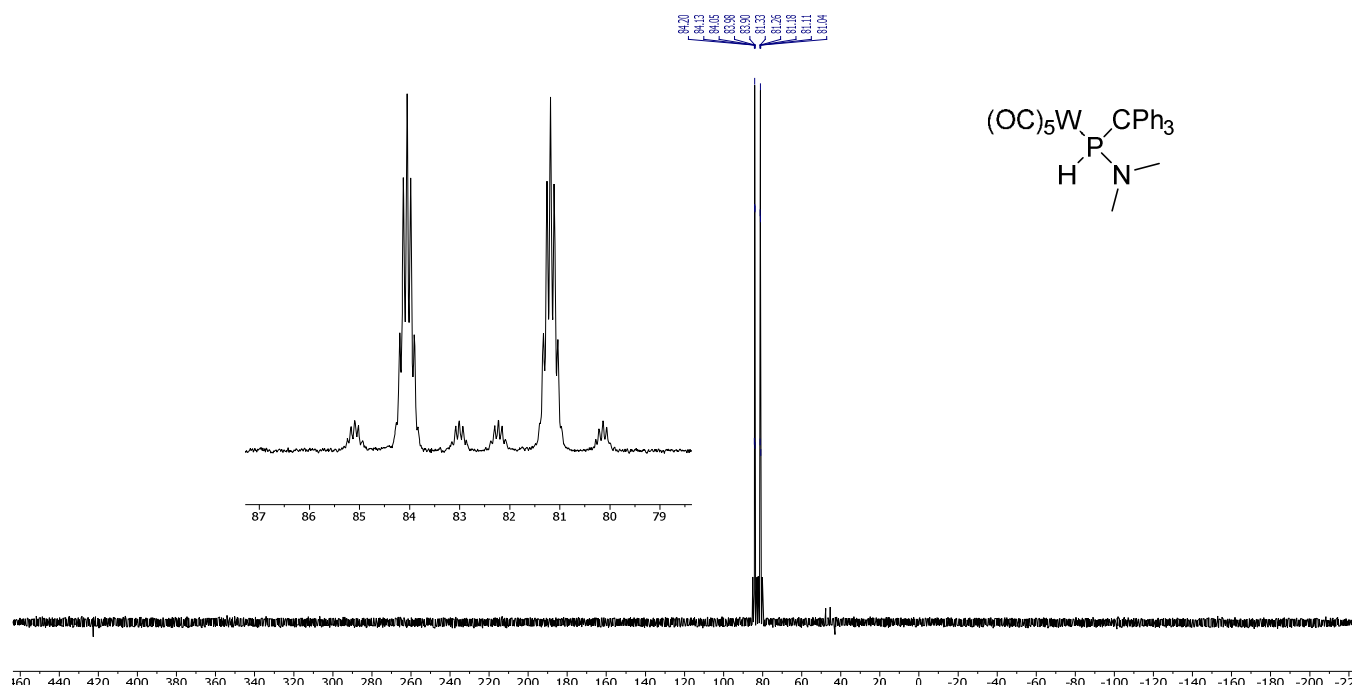

**Figure S15:**  $^{31}\text{P}$  NMR spectrum of **6** in  $\text{CDCl}_3$  at 121.5 MHz.

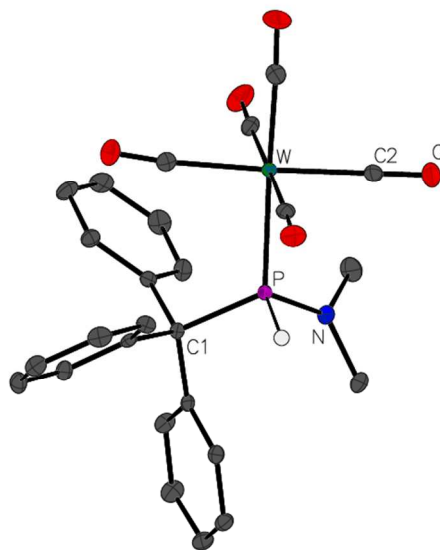

**Figure S16:** Crystal structure of **6**. Suitable single-crystals of **6** were obtained from a concentrated diethyl ether solution at 4 °C. Data were collected with a Bruker D8-Venture diffractometer equipped with a low-temperature device at 100 K by using graphite-monochromated Mo K $\alpha$  radiation ( $\lambda = 0.71073 \text{ \AA}$ ). The structure was solved by intrinsic phasing methods (SHELXT 2015) and refined by full-matrix least squares on  $F^2$  (SHELXL 2015)<sup>1</sup>:  $\text{C}_{26}\text{H}_{22}\text{NO}_5\text{PW}$ , Mr = 643.26, crystal dimensions  $0.24 \times 0.18 \times 0.16 \text{ mm}^3$ , monoclinic, space group C2/c, Z = 8,  $a = 31.6772(9) \text{ \AA}$ ,  $b = 11.5478(3) \text{ \AA}$ ,  $c = 13.5495(4) \text{ \AA}$ ,  $\alpha = 90^\circ$ ,  $\beta = 99.2472(9)^\circ$ ,  $\gamma = 90^\circ$ ,  $V = 4892.0(2) \text{ \AA}^3$ ,  $d_{\text{calcd}} = 1.747 \text{ g cm}^{-3}$ ,  $\mu = 4.825 \text{ mm}^{-1}$ , transmission factors (min/max) 0.4351/0.7459, empirical absorption correction from equivalents,  $2\theta_{\text{max}} = 55.996^\circ$ , no. of unique data 5896,  $R_{\text{int}} = 0.0351$ ,  $R_1$  (for  $I > 2\sigma(I)$ ) = 0.01498,  $wR_2$  (for all data) = 0.0370, final  $R_1 = 0.0157$ , goodness of fit 1.141,  $\Delta F$  (max/min) =  $0.45 / -1.01 \text{ e \AA}^{-3}$ . CCDC 1529738 contains the supplementary crystallographic data for this paper. The data can be obtained free of charge from The Cambridge Crystallographic Data Centre via [www.ccdc.cam.ac.uk/structures](http://www.ccdc.cam.ac.uk/structures).

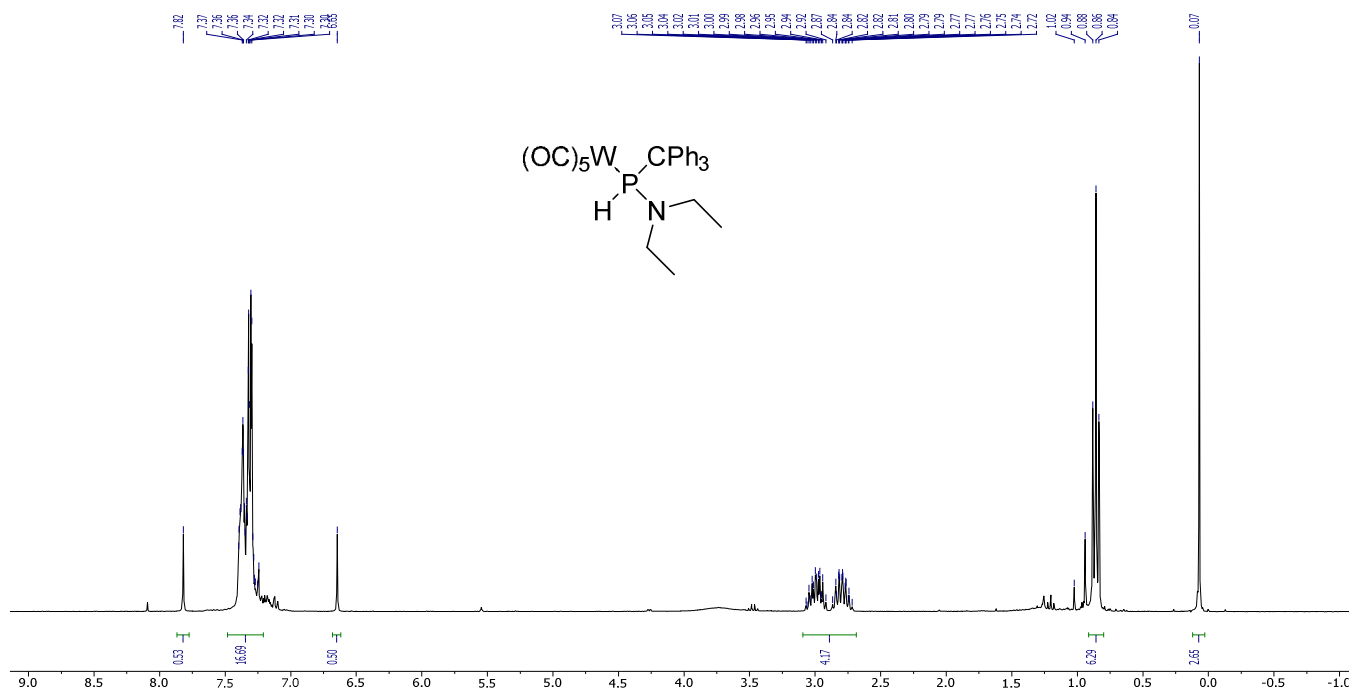

Figure S17:  $^1H$  NMR spectrum of 7 in  $CDCl_3$  at 300.1 MHz.

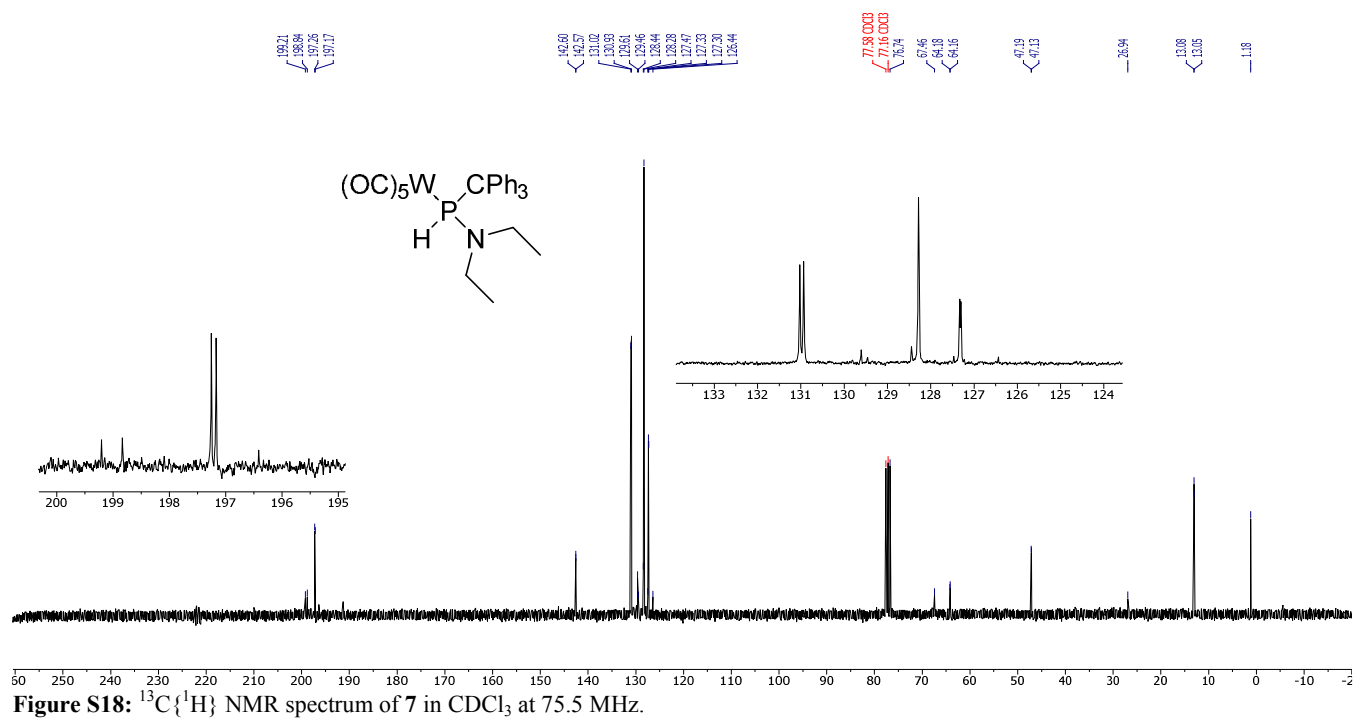

Figure S18:  $^{13}C\{^1H\}$  NMR spectrum of 7 in  $CDCl_3$  at 75.5 MHz.

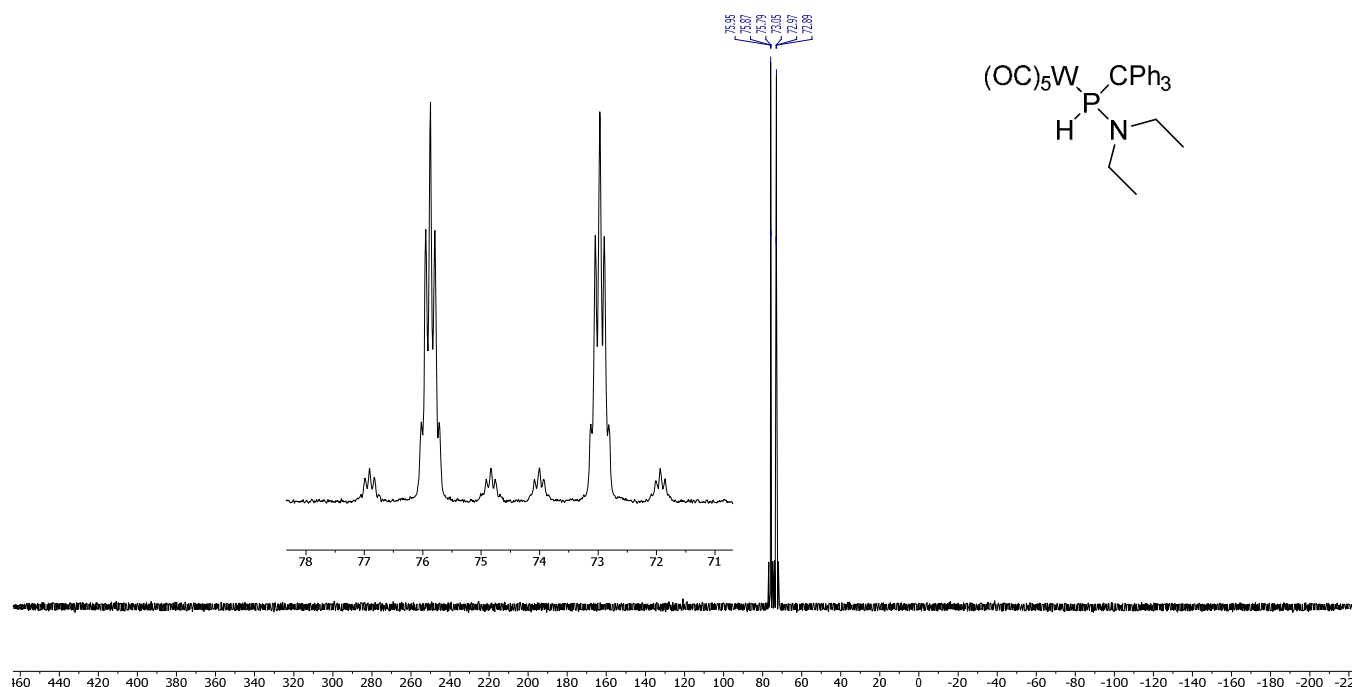

**Figure S19:**  $^{31}\text{P}$  NMR spectrum of **7** in  $\text{CDCl}_3$  at 121.5 MHz.

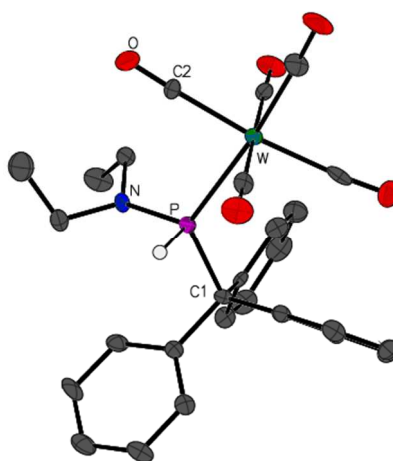

**Figure S20:** Crystal structure of **7**. Suitable single-crystals of **7** were obtained from a concentrated diethyl ether solution at 4 °C. Data were collected with a Bruker X8-KappaApexII diffractometer equipped with a low-temperature device at 100(2) K by using graphite-monochromated Mo K $\alpha$  radiation ( $\lambda = 0.71073$  Å). The structure was solved by intrinsic phasing methods (SHELXT 2015) and refined by full-matrix least squares on  $F^2$  (SHELXL 2015)<sup>1</sup>:  $\text{C}_{28}\text{H}_{26}\text{NO}_5\text{PW}$ , Mr = 671.32, crystal dimensions  $0.35 \times 0.20 \times 0.10$  mm<sup>3</sup>, triclinic, space group P-1, Z = 4,  $a = 10.7367(7)$  Å,  $b = 15.6770(10)$  Å,  $c = 17.4538(10)$  Å,  $\alpha = 104.204(3)^\circ$ ,  $\beta = 98.484(3)^\circ$ ,  $\gamma = 104.184(3)^\circ$ ,  $V = 2692.9(3)$  Å<sup>3</sup>,  $d_{\text{calcd}} = 1.656$  g cm<sup>-3</sup>,  $\mu = 4.386$  mm<sup>-1</sup>, transmission factors (min/max) 0.0734/0.2638, empirical absorption correction,  $2\theta_{\text{max}} = 53.998^\circ$ , no. of unique data 13114,  $R_{\text{int}} = 0.0700$ ,  $R_1$  (for  $I > 2\sigma(I)$ ) = 0.0461,  $wR_2$  (for all data) = 0.1134, final  $R_1 = 0.0605$ , goodness of fit 1.052,  $\Delta F$  (max/min) = 2.50 / -2.35 e Å<sup>-3</sup>. CCDC 1529747 contains the supplementary crystallographic data for this paper. The data can be obtained free of charge from The Cambridge Crystallographic Data Centre via [www.ccdc.cam.ac.uk/structures](http://www.ccdc.cam.ac.uk/structures).

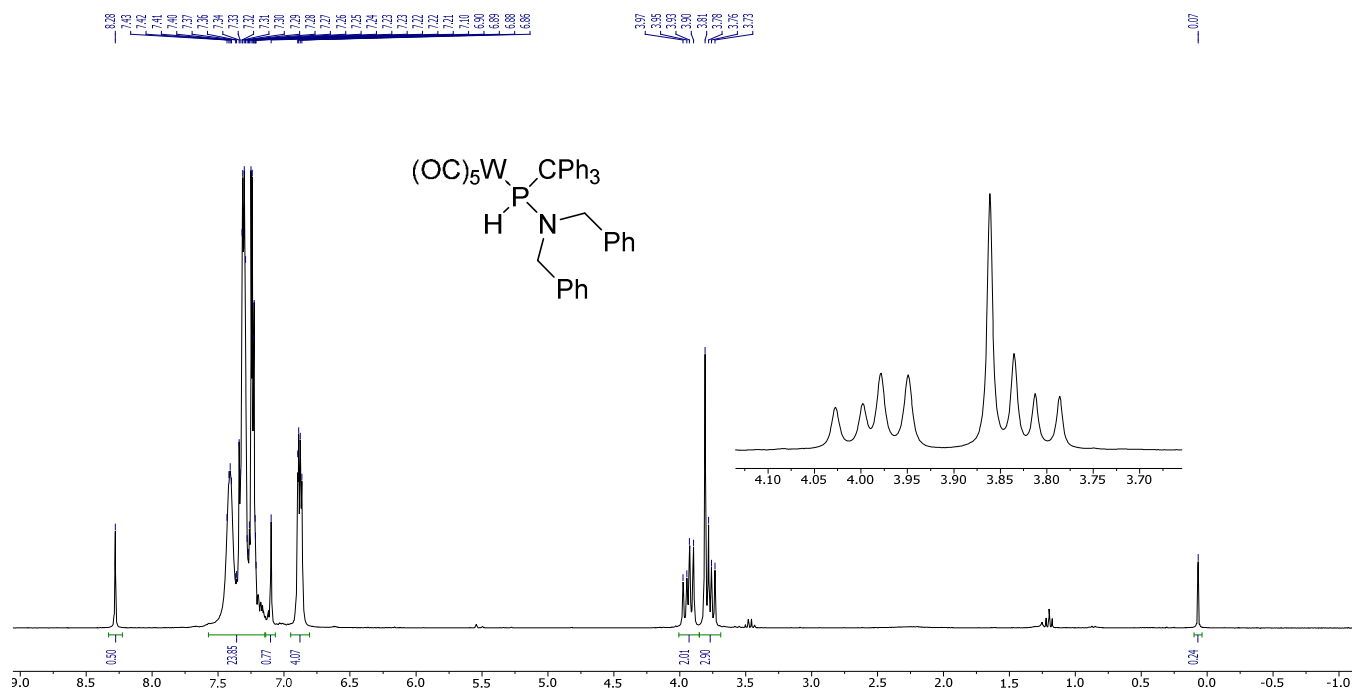

Figure S21: <sup>1</sup>H NMR spectrum of **8** in CDCl<sub>3</sub> at 300.1 MHz.

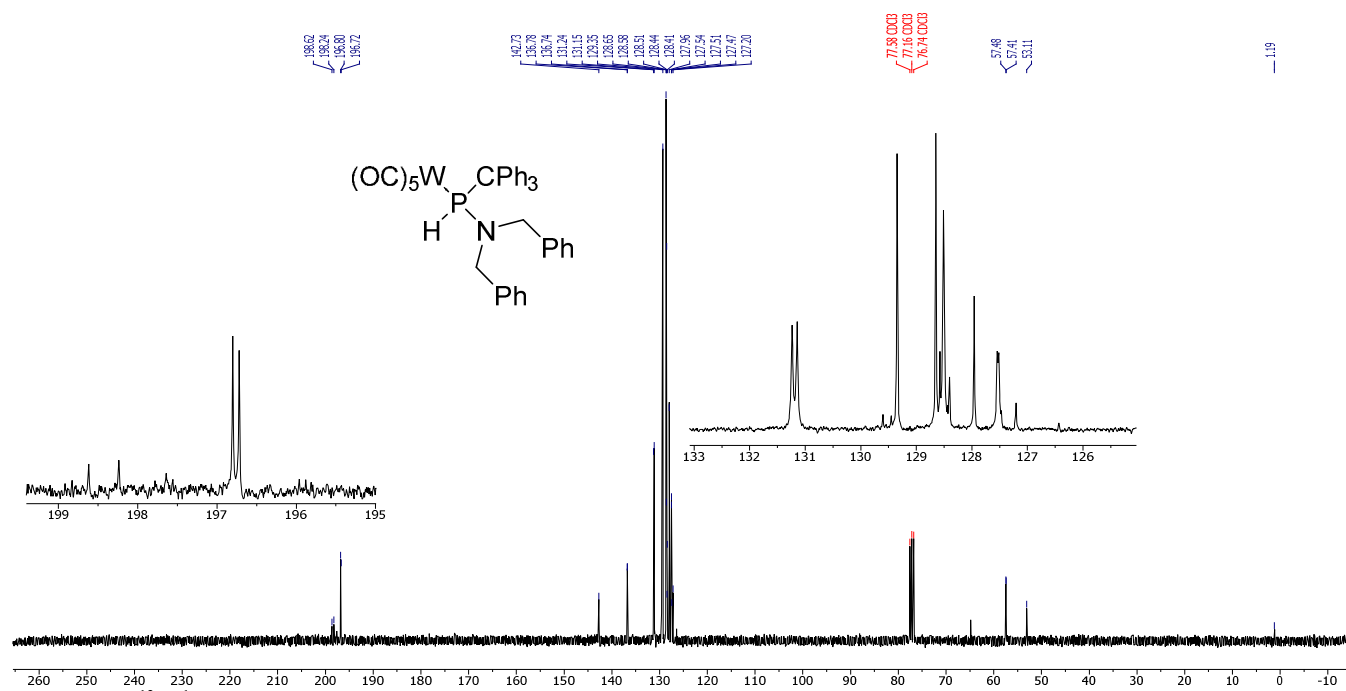

Figure S22: <sup>13</sup>C{<sup>1</sup>H} NMR spectrum of **8** in CDCl<sub>3</sub> at 75.5 MHz.

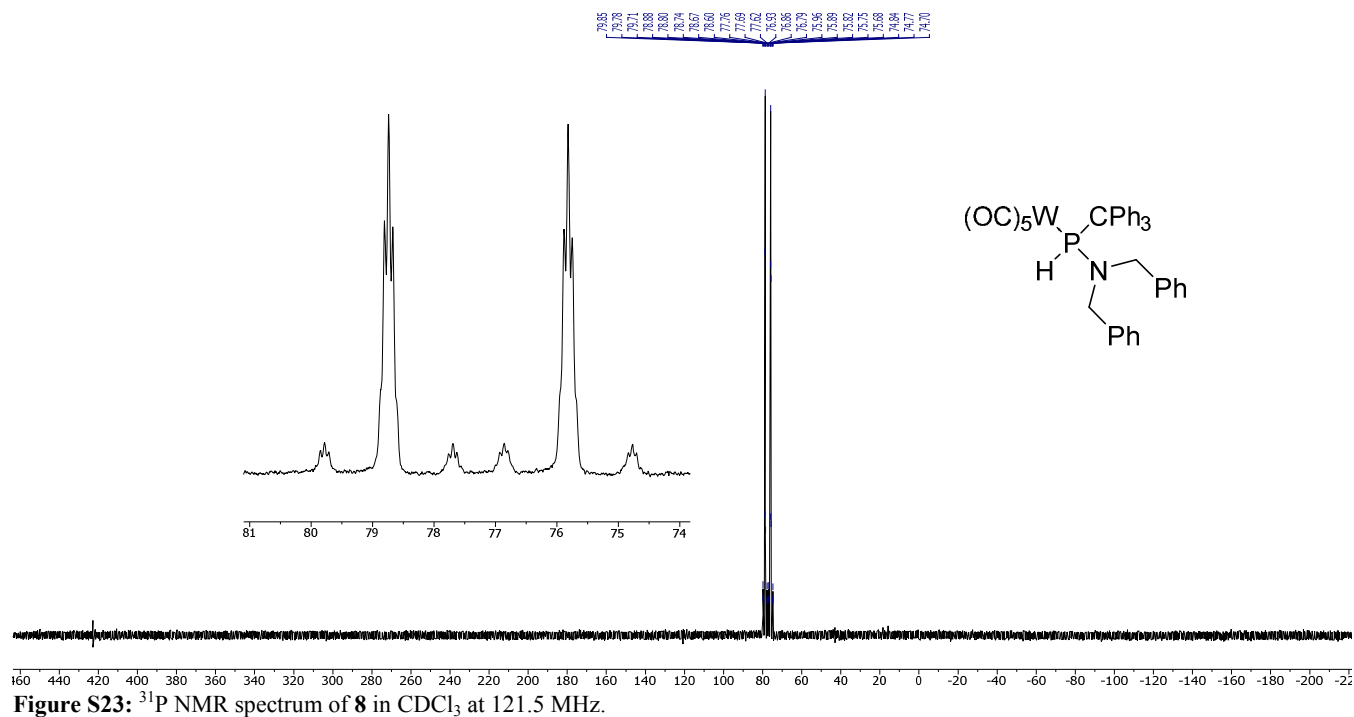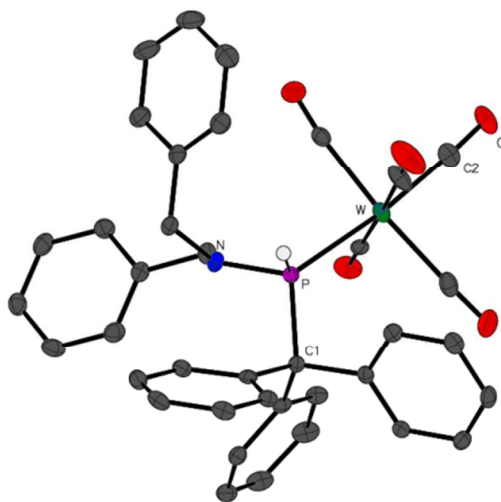

**Figure S24:** Crystal structure of **8**. Suitable single-crystals of **8** were obtained from a concentrated diethyl ether solution at 4 °C. Data were collected with a Bruker D8-Venture diffractometer equipped with a low-temperature device at 99.99 K by using graphite-monochromated Mo K $\alpha$  radiation ( $\lambda = 0.71073 \text{ \AA}$ ). The structure was solved by intrinsic phasing methods (SHELXT 2015) and refined by full-matrix least squares on  $F^2$  (SHELXL 2015)<sup>1</sup>:  $\text{C}_{38}\text{H}_{30}\text{NO}_5\text{PW}$ , Mr = 795.45, crystal dimensions  $0.27 \times 0.22 \times 0.16 \text{ mm}^3$ , triclinic, space group  $P\bar{1}$ , Z = 2,  $a = 10.419(4) \text{ \AA}$ ,  $b = 10.508(5) \text{ \AA}$ ,  $c = 16.971(8) \text{ \AA}$ ,  $\alpha = 84.29(2)^\circ$ ,  $\beta = 78.87(2)^\circ$ ,  $\gamma = 64.441(19)^\circ$ ,  $V = 1644.5(12) \text{ \AA}^3$ ,  $d_{\text{calcd}} = 1.606 \text{ g cm}^{-3}$ ,  $\mu = 3.606 \text{ mm}^{-1}$ , transmission factors (min/max) 0.4719/0.7459, empirical absorption correction,  $2\theta_{\text{max}} = 55.998^\circ$ , no. of unique data 7851,  $R_{\text{int}} = 0.0550$ ,  $R_1$  (for  $I > 2\sigma(I)$ ) = 0.0214,  $wR_2$  (for all data) = 0.0455, final  $R_1 = 0.0264$ , goodness of fit 1.048,  $\Delta F$  (max/min) = 0.83 / -1.17  $\text{e \AA}^{-3}$ . CCDC 1529739 contains the supplementary crystallographic data for this paper. The data can be obtained free of charge from The Cambridge Crystallographic Data Centre via [www.ccdc.cam.ac.uk/structures](http://www.ccdc.cam.ac.uk/structures).

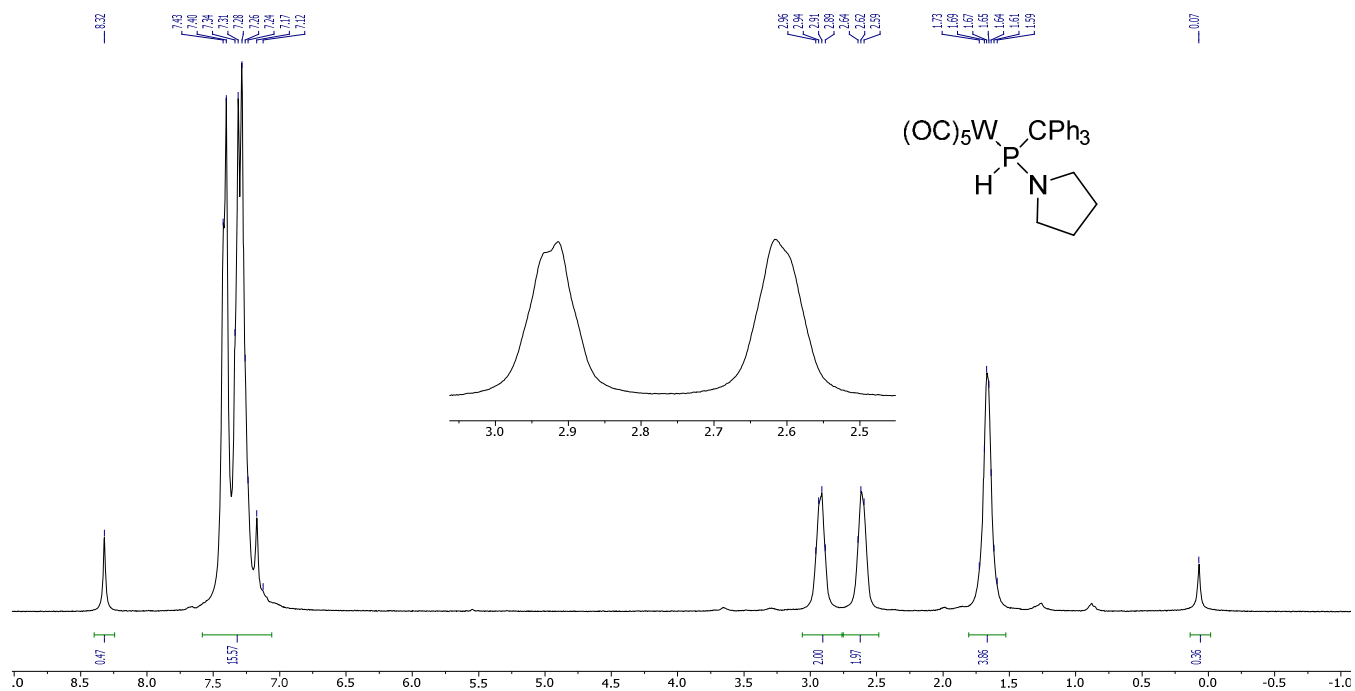

Figure S25:  $^1H$  NMR spectrum of **9** in  $CDCl_3$  at 300.1 MHz.

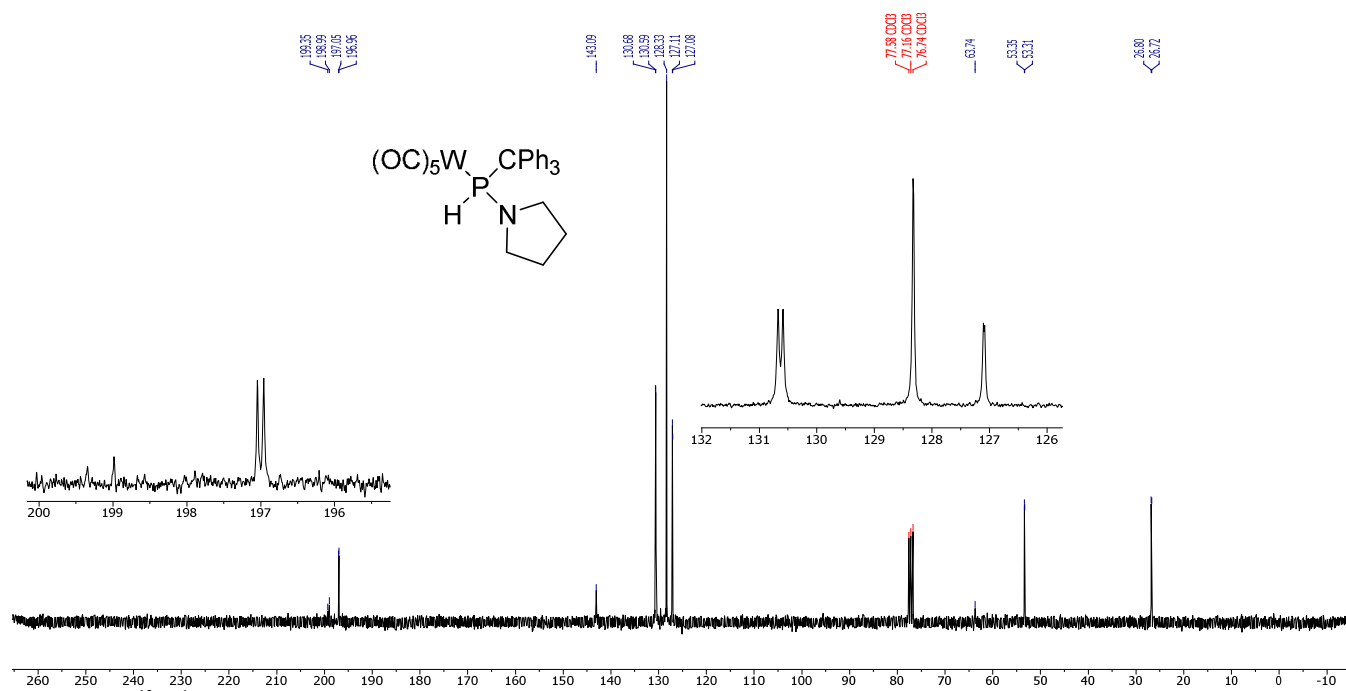

Figure S26:  $^{13}C\{^1H\}$  NMR spectrum of **9** in  $CDCl_3$  at 75.5 MHz.

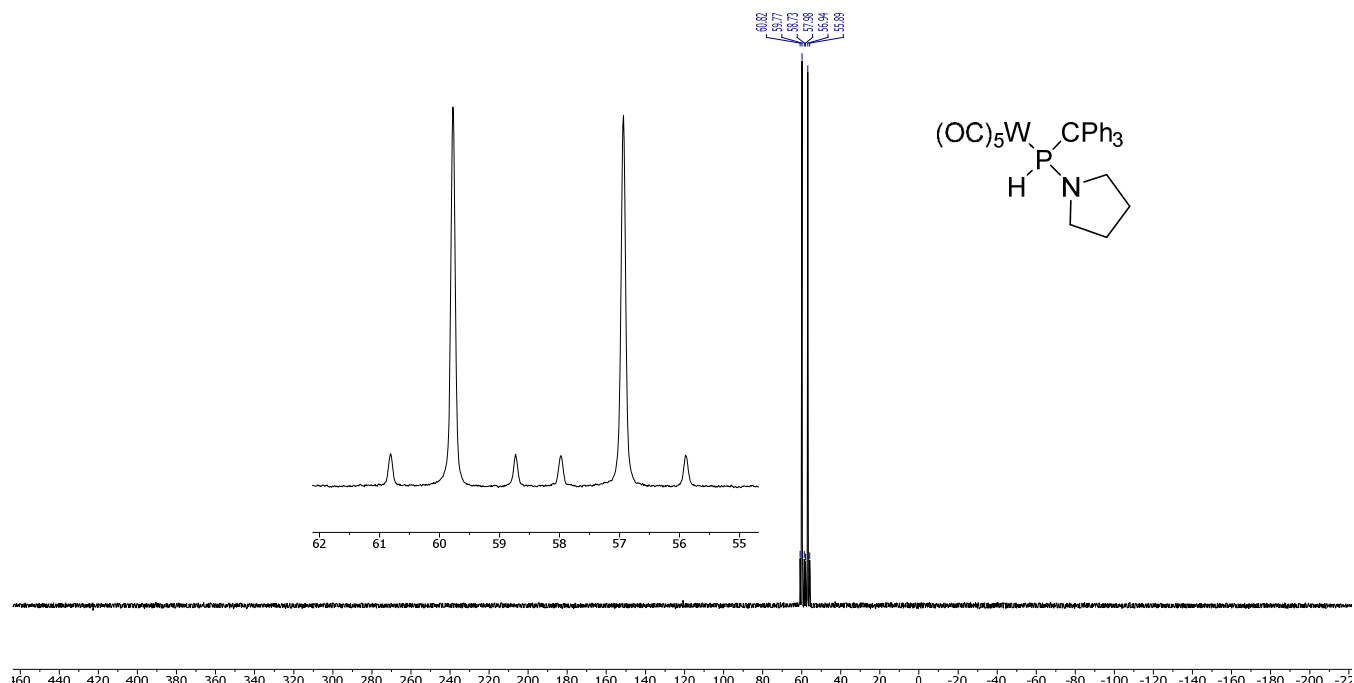

**Figure S27:**  $^{31}\text{P}$  NMR spectrum of **9** in  $\text{CDCl}_3$  at 121.5 MHz.

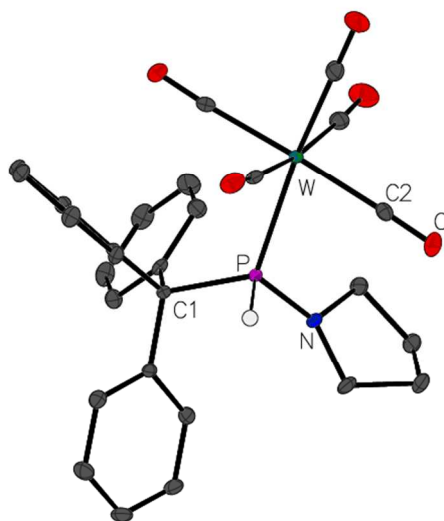

**Figure S28:** Crystal structure of **9**. Suitable single-crystals of **9** were obtained from a concentrated diethyl ether solution at 4 °C. Data were collected with a Bruker D8-Venture diffractometer equipped with a low-temperature device at 99.99 K by using graphite-monochromated Mo K $\alpha$  radiation ( $\lambda = 0.71073 \text{ \AA}$ ). The structure was solved by intrinsic phasing methods (SHELXT 2015) and refined by full-matrix least squares on  $F^2$  (SHELXL 2015)<sup>1</sup>:  $\text{C}_{28}\text{H}_{24}\text{NO}_5\text{PW}$ , Mr = 669.30, crystal dimensions  $0.26 \times 0.24 \times 0.2 \text{ mm}^3$ , triclinic, space group  $P\bar{1}$ , Z = 2,  $a = 10.0227(4) \text{ \AA}$ ,  $b = 10.6252(4) \text{ \AA}$ ,  $c = 13.1760(5) \text{ \AA}$ ,  $\alpha = 76.5244(14)^\circ$ ,  $\beta = 75.7674(14)^\circ$ ,  $\gamma = 75.8317(13)^\circ$ ,  $V = 1296.22(9) \text{ \AA}^3$ ,  $d_{\text{calcd}} = 1.715 \text{ g cm}^{-3}$ ,  $\mu = 4.556 \text{ mm}^{-1}$ , transmission factors (min/max) 0.4188/0.7459, empirical absorption correction,  $2\theta_{\text{max}} = 55.99^\circ$ , no. of unique data 6245,  $R_{\text{int}} = 0.0449$ ,  $R_1$  (for  $I > 2\sigma(I)$ ) = 0.0158,  $wR_2$  (for all data) = 0.0385, final  $R_1$  = 0.0175, goodness of fit 1.087,  $\Delta F$  (max/min) = 0.49 / -1.39  $\text{e \AA}^{-3}$ . CCDC 1529741 contains the supplementary crystallographic data for this paper. The data can be obtained free of charge from The Cambridge Crystallographic Data Centre via [www.ccdc.cam.ac.uk/structures](http://www.ccdc.cam.ac.uk/structures).

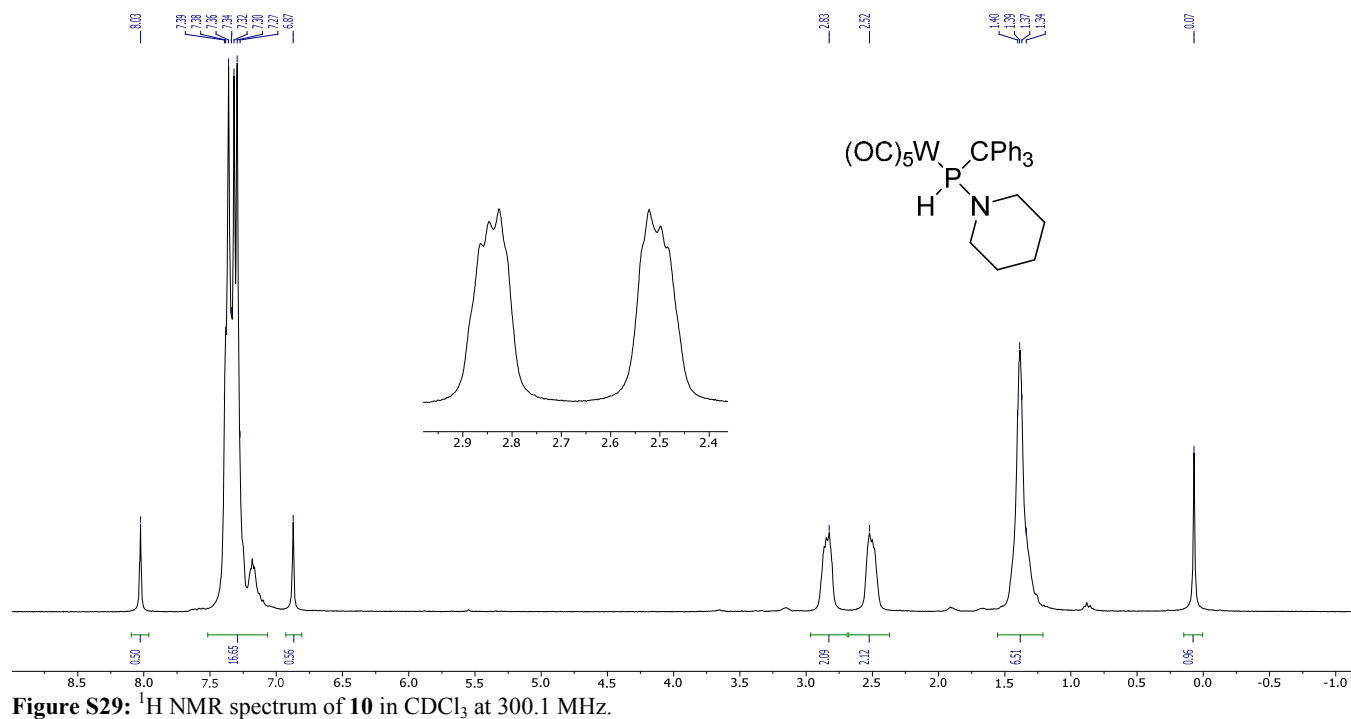

**Figure S29:** <sup>1</sup>H NMR spectrum of **10** in CDCl<sub>3</sub> at 300.1 MHz.

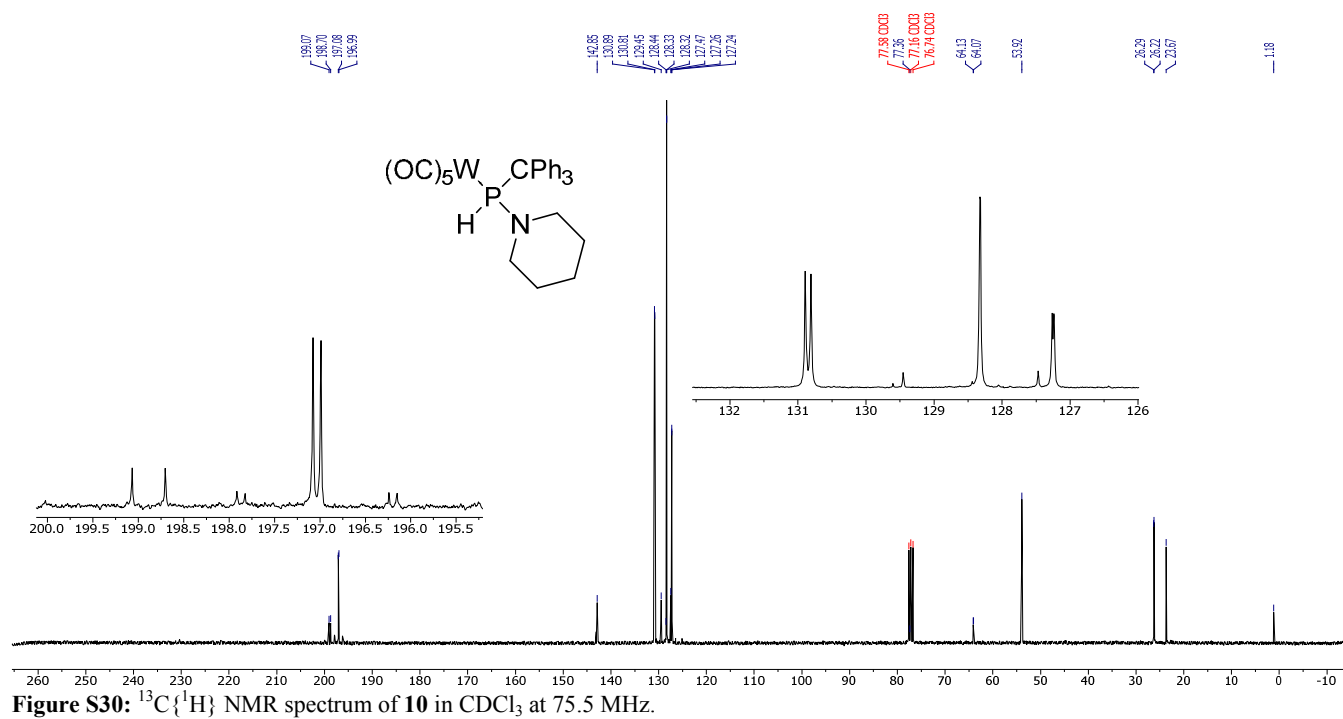

**Figure S30:** <sup>13</sup>C{<sup>1</sup>H} NMR spectrum of **10** in CDCl<sub>3</sub> at 75.5 MHz.



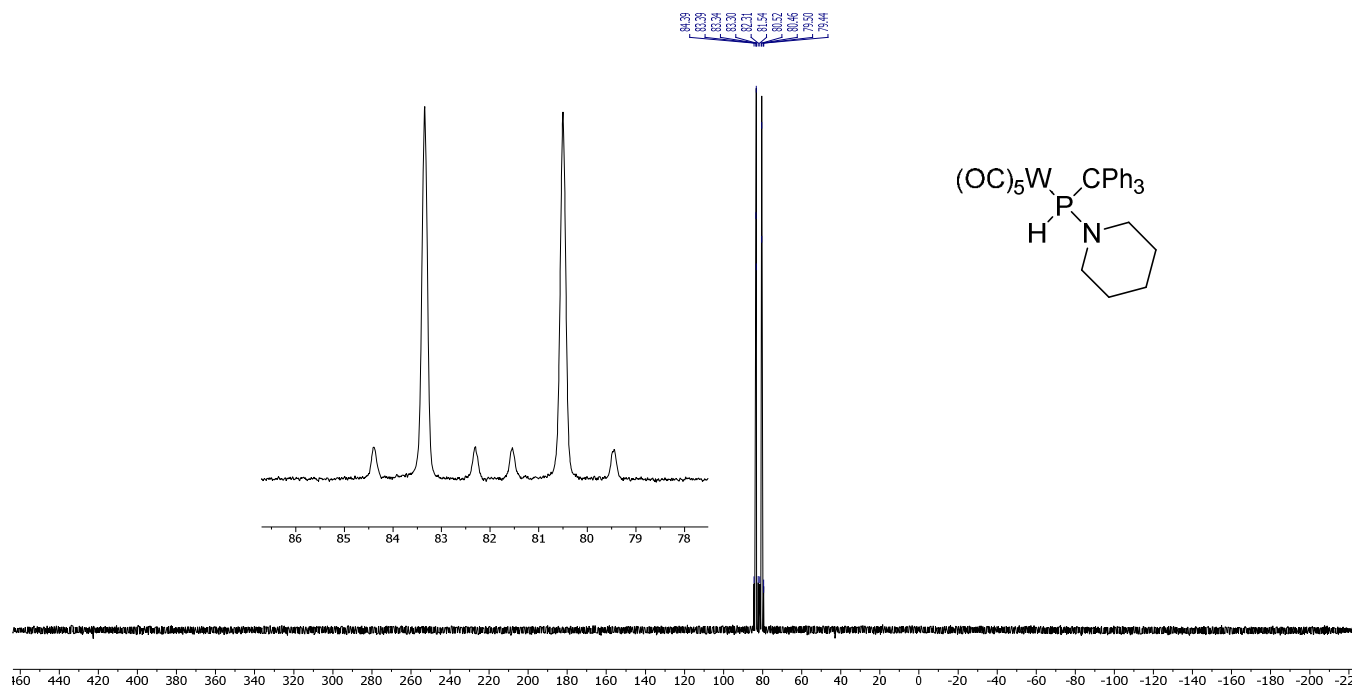

**Figure S31:**  $^{31}\text{P}$  NMR spectrum of **10** in  $\text{CDCl}_3$  at 121.5 MHz.

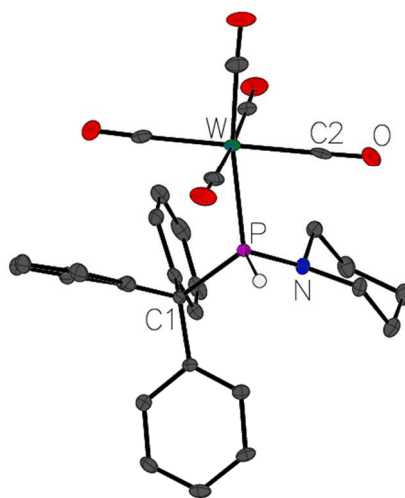

**Figure S32:** Crystal structure of **10**. Suitable single-crystals of **10** were obtained from a concentrated diethyl ether solution at 4 °C. Data were collected with a Bruker D8-Venture diffractometer equipped with a low-temperature device at 100 K by using graphite-monochromated Mo  $K\alpha$  radiation ( $\lambda = 0.71073 \text{ \AA}$ ). The structure was solved by intrinsic phasing methods (SHELXT 2015) and refined by full-matrix least squares on  $F^2$  (SHELXL 2015)<sup>1</sup>:  $\text{C}_{29}\text{H}_{26}\text{NO}_5\text{PW}$ , Mr = 683.33, crystal dimensions  $0.15 \times 0.08 \times 0.06 \text{ mm}^3$ , monoclinic, space group  $\text{P2}_1/\text{c}$ ,  $Z = 8$ ,  $a = 14.7592(5) \text{ \AA}$ ,  $b = 32.0367(10) \text{ \AA}$ ,  $c = 11.2598(4) \text{ \AA}$ ,  $\alpha = 90^\circ$ ,  $\beta = 91.4175(12)^\circ$ ,  $\gamma = 90^\circ$ ,  $V = 5322.4(3) \text{ \AA}^3$ ,  $d_{\text{calc}} = 1.706 \text{ g cm}^{-3}$ ,  $\mu = 4.440 \text{ mm}^{-1}$ , transmission factors (min/max) 0.5079/0.7459, empirical absorption correction,  $2\theta_{\text{max}} = 56^\circ$ , no. of unique data 12836,  $R_{\text{int}} = 0.0403$ ,  $R_1$  (for  $I > 2\sigma(I)$ ) = 0.0276,  $wR_2$  (for all data) = 0.0559, final  $R_1 = 0.0333$ , goodness of fit 1.161,  $\Delta F$  (max/min) =  $1.30 / -2.30 \text{ e \AA}^{-3}$ . CCDC 1529737 contains the supplementary crystallographic data for this paper. The data can be obtained free of charge from The Cambridge Crystallographic Data Centre via [www.ccdc.cam.ac.uk/structures](http://www.ccdc.cam.ac.uk/structures).

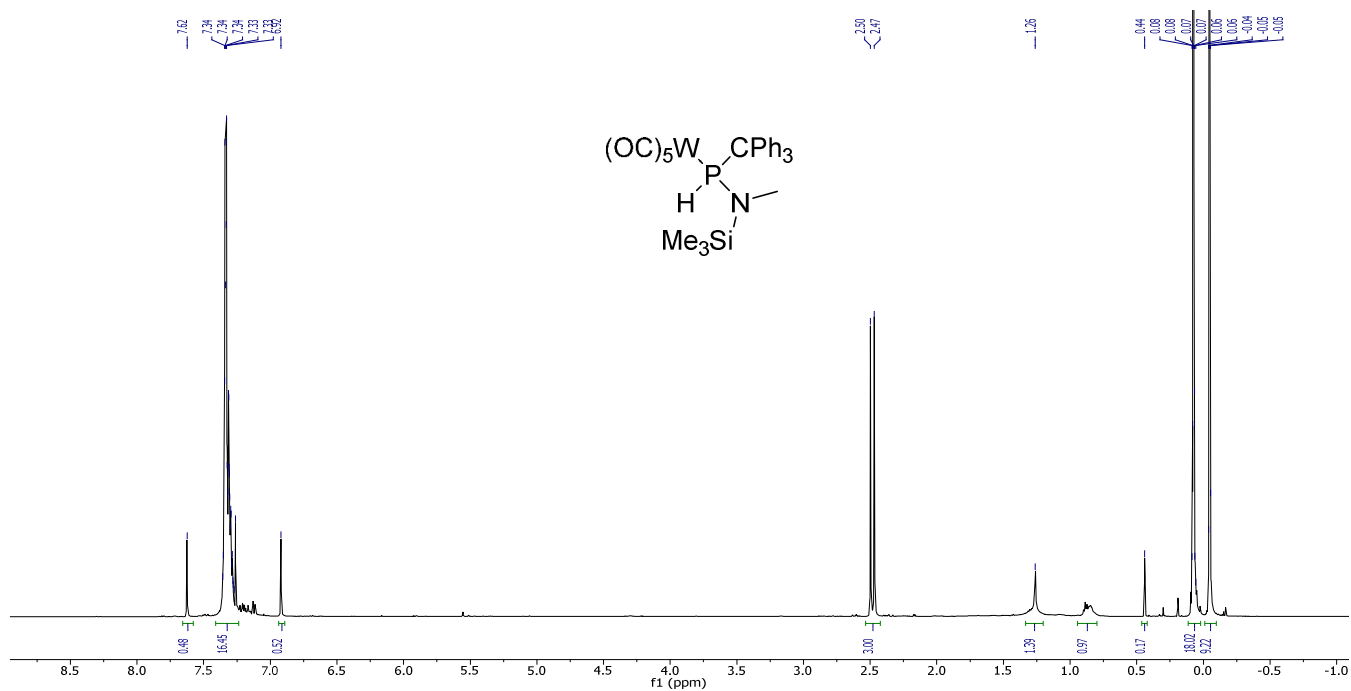

Figure S33:  $^1H$  NMR spectrum of **12** in  $CDCl_3$  at 500.2 MHz.

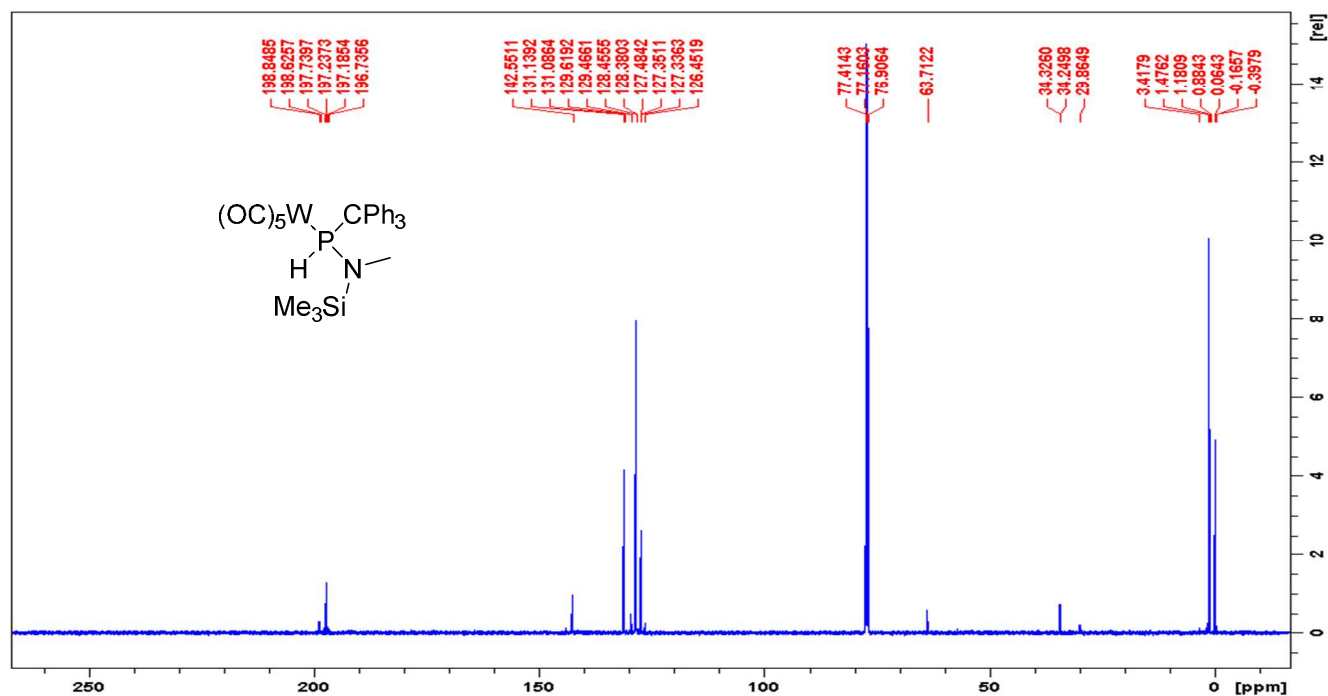

Figure S34:  $^{13}C\{^1H\}$  NMR spectrum of **12** in  $CDCl_3$  at 176.1 MHz.

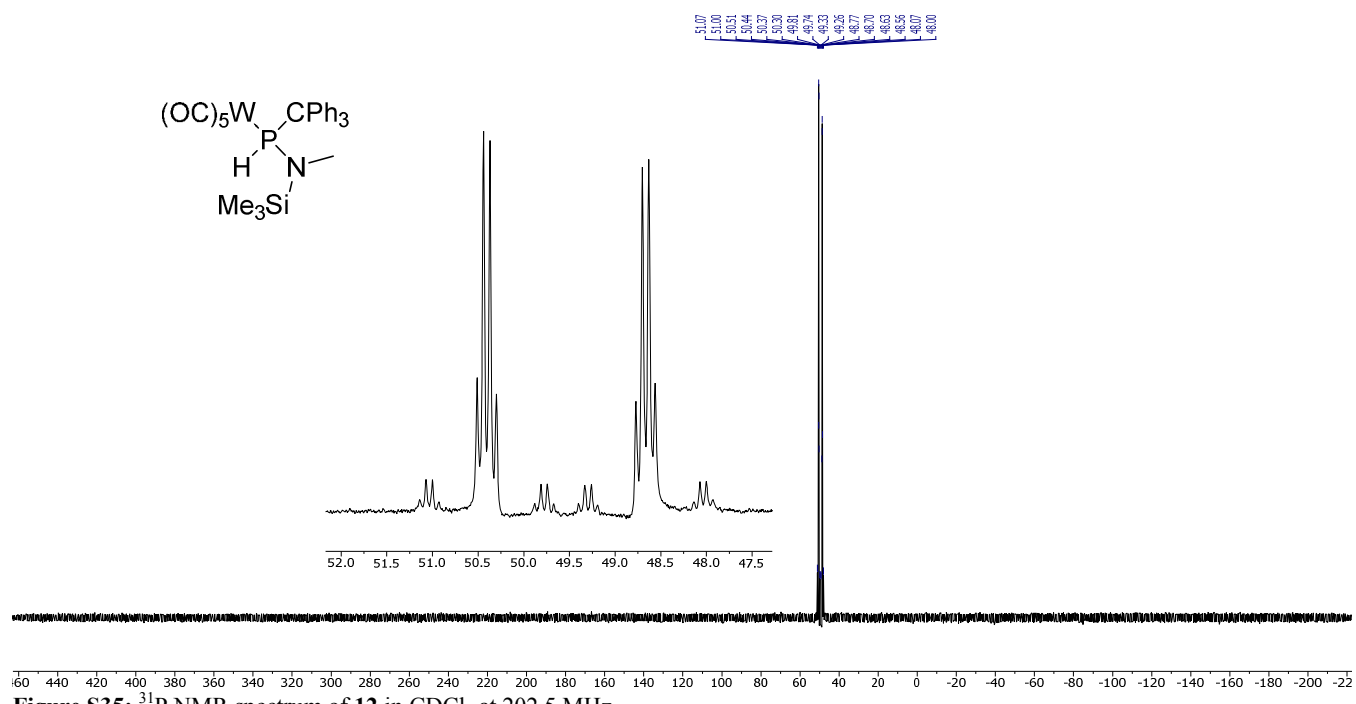

**Figure S35:** <sup>31</sup>P NMR spectrum of **12** in CDCl<sub>3</sub> at 202.5 MHz.

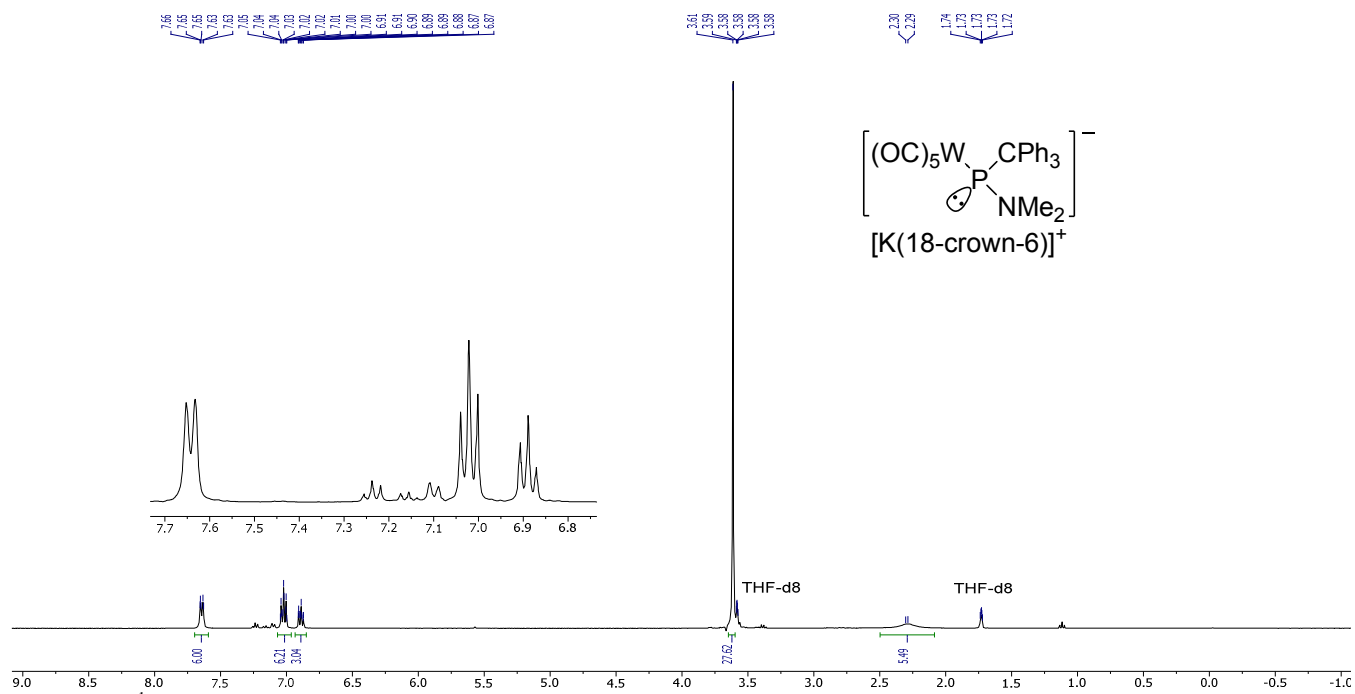

Figure S36:  $^1\text{H}$  NMR spectrum of **13** in THF-d8 at 400.1 MHz.

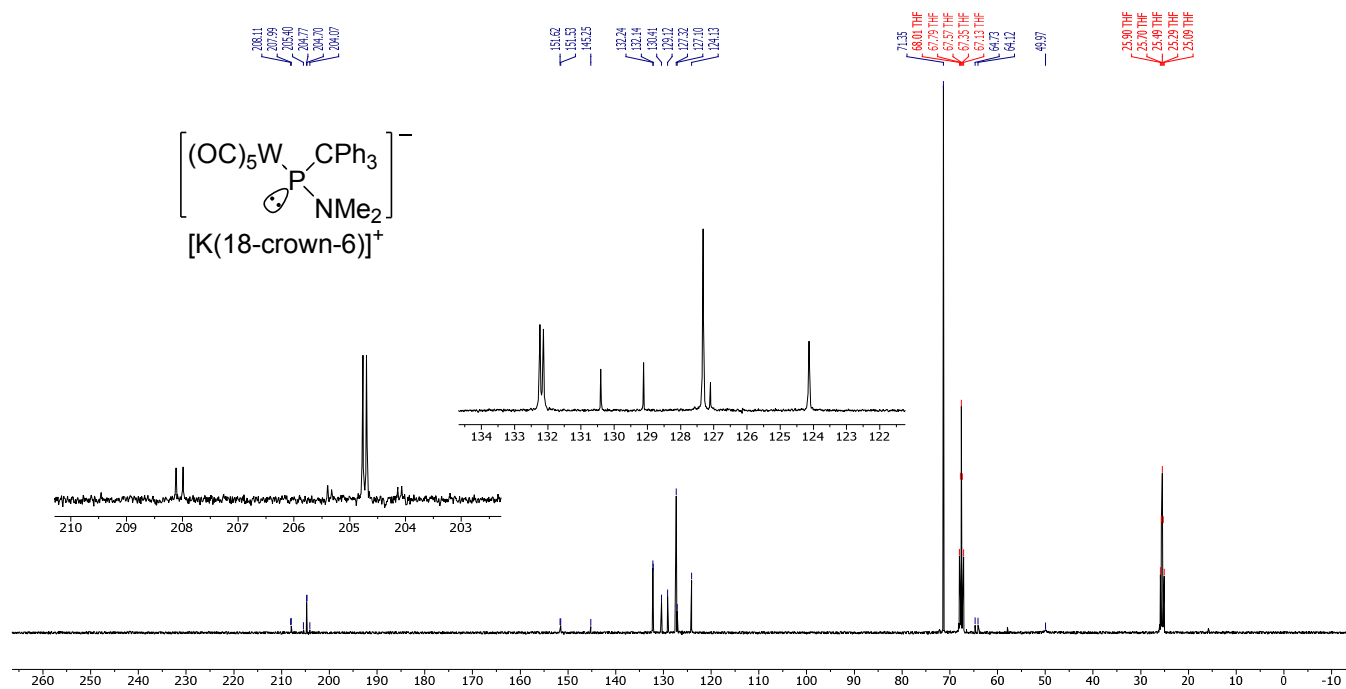

Figure S37:  $^{13}\text{C}\{^1\text{H}\}$  NMR spectrum of **13** in THF-d8 at 100.6 MHz.

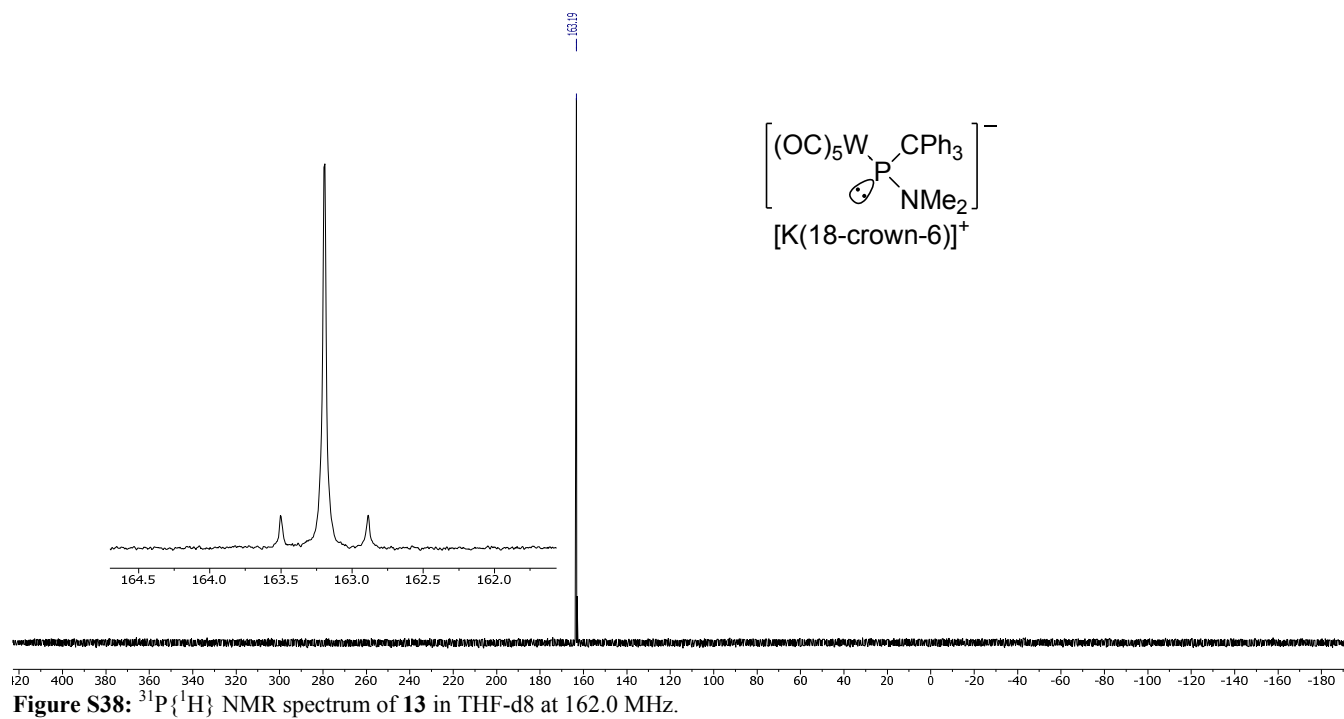

**Figure S38:**  $^{31}\text{P}\{^1\text{H}\}$  NMR spectrum of **13** in THF-d8 at 162.0 MHz.

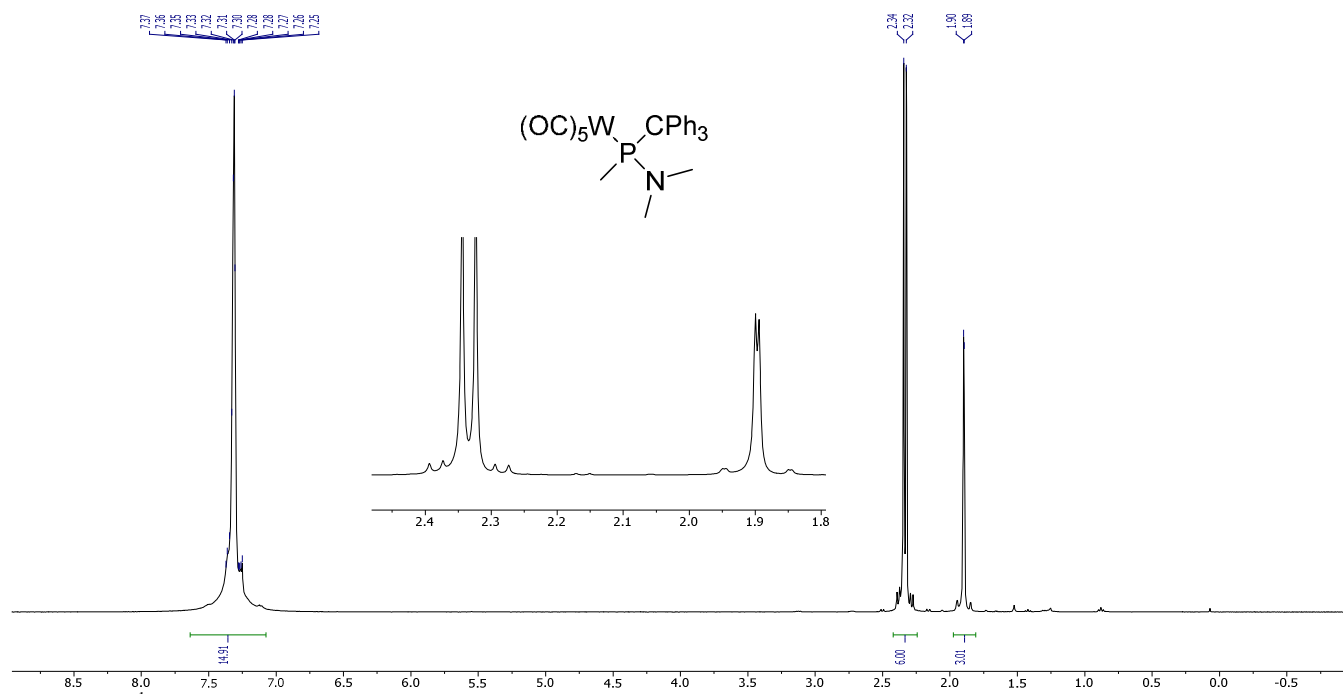

Figure S39:  $^1H$  NMR spectrum of **14** in  $CDCl_3$  at 400.1 MHz.

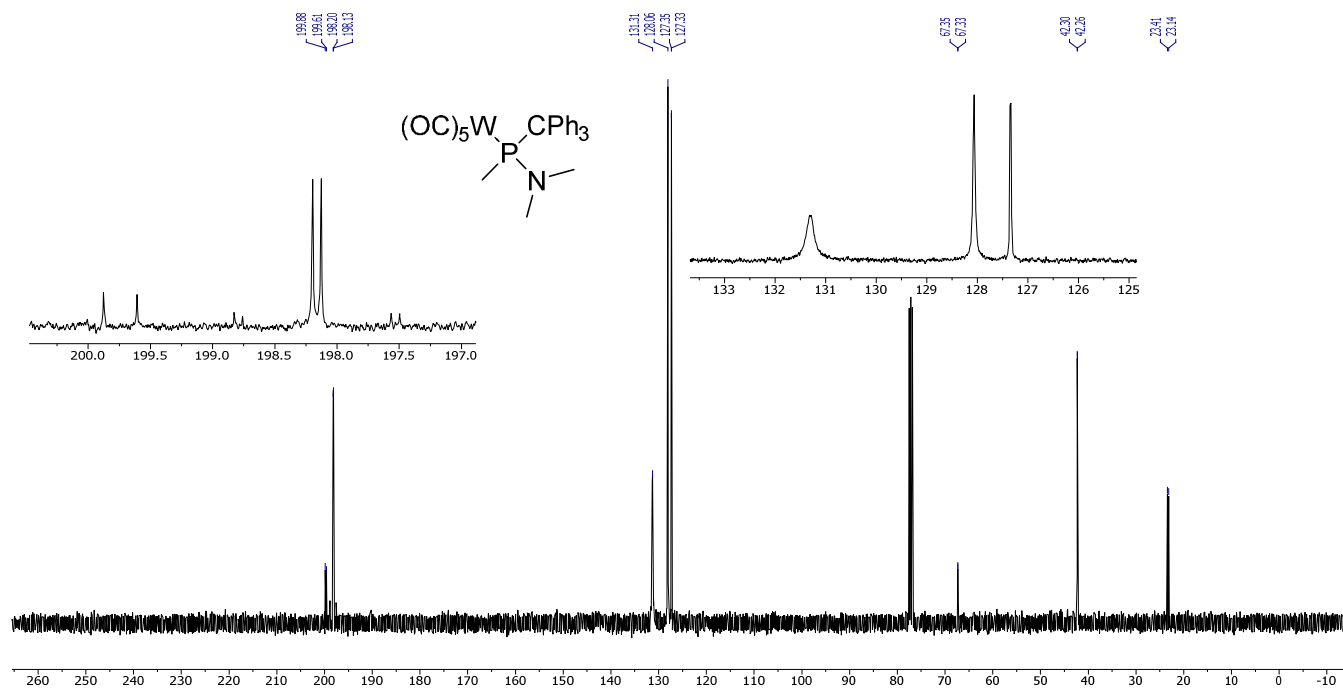

Figure S40:  $^{13}C\{^1H\}$  NMR spectrum of **14** in  $CDCl_3$  at 100.6 MHz.

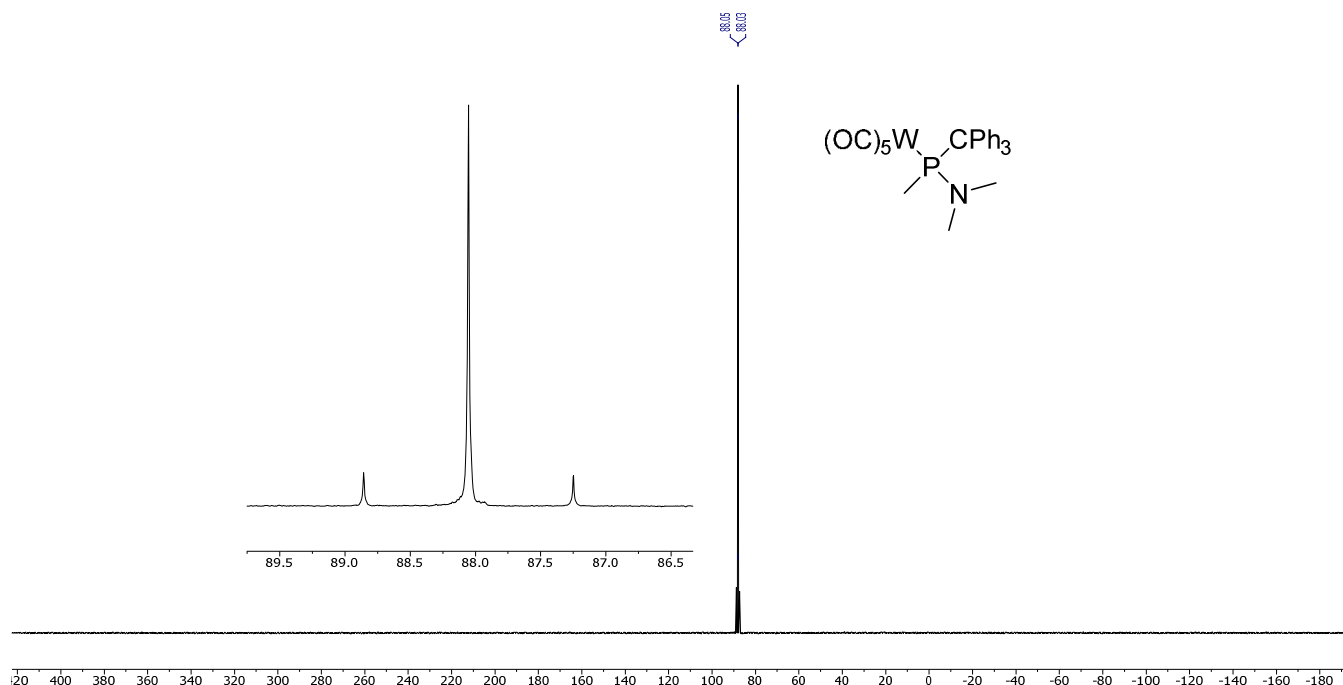

**Figure S41:**  $^{31}P\{^1H\}$  NMR spectrum of **14** in  $CDCl_3$  at 162.0 MHz.

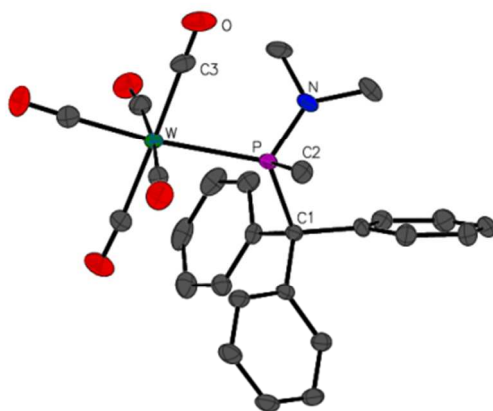

**Figure S42:** Crystal structure of **14**. Suitable single-crystals of **14** were obtained from a concentrated diethyl ether solution at 4 °C. Data were collected with a Bruker D8-Venture diffractometer equipped with a low-temperature device at 123 K by using graphite-monochromated Mo  $K\alpha$  radiation ( $\lambda = 0.71073$  Å). The structure was solved by intrinsic phasing methods (SHELXT 2015) and refined by full-matrix least squares on  $F^2$  (SHELXL 2015)<sup>1</sup>:  $C_{27}H_{24}NO_5PW$ , Mr = 657.29, crystal dimensions  $0.22 \times 0.21 \times 0.17$  mm<sup>3</sup>, triclinic, space group P-1, Z = 4, a = 10.5144(6) Å, b = 15.2601(10) Å, c = 16.9086(11) Å,  $\alpha = 105.035(2)^\circ$ ,  $\beta = 102.792(2)^\circ$ ,  $\gamma = 91.822(2)^\circ$ , V = 2543.6(3) Å<sup>3</sup>,  $d_{\text{calcd}} = 1.716$  g cm<sup>-3</sup>,  $\mu = 4.642$  mm<sup>-1</sup>, transmission factors (min/max) 0.5165/0.7459, empirical absorption correction,  $2\theta_{\text{max}} = 55.998^\circ$ , no. of unique data 12269,  $R_{\text{int}} = 0.0521$ ,  $R_1$  (for  $I > 2\sigma(I)$ ) = 0.0182,  $wR_2$  (for all data) = 0.0416, final  $R_1 = 0.0249$ , goodness of fit 1.099,  $\Delta F$  (max/min) = 0.69 / -1.11 e Å<sup>-3</sup>. CCDC 1529743 contains the supplementary crystallographic data for this paper. The data can be obtained free of charge from The Cambridge Crystallographic Data Centre via [www.ccdc.cam.ac.uk/structures](http://www.ccdc.cam.ac.uk/structures).





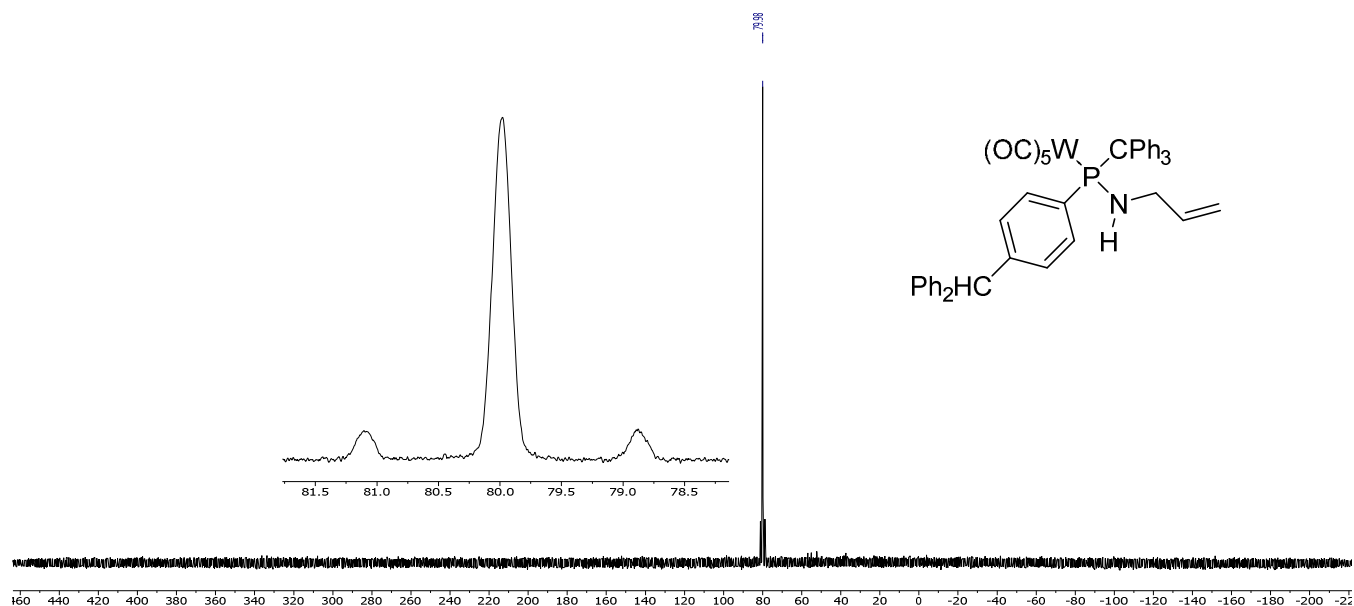

**Figure S45:**  $^{31}\text{P}\{^1\text{H}\}$  NMR spectrum of **17** in  $\text{CDCl}_3$  at 121.5 MHz.

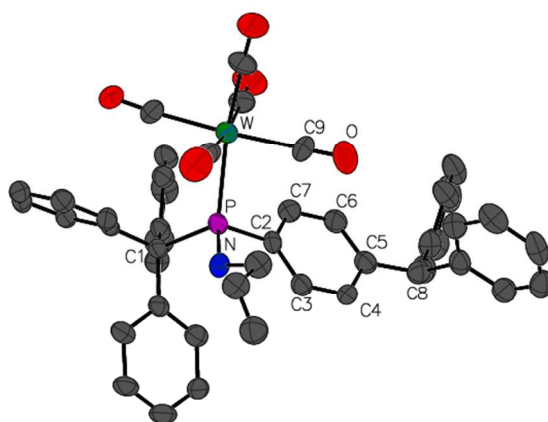

**Figure S46:** Crystal structure of **17**. Suitable single-crystals of **17** were obtained from a concentrated diethyl ether solution at 4 °C. Data were collected with a Bruker X8-KappaApexII diffractometer equipped with a low-temperature device at 100 K by using graphite-monochromated Mo  $K\alpha$  radiation ( $\lambda = 0.71073 \text{ \AA}$ ). The structure was solved by intrinsic phasing methods (SHELXT 2015) and refined by full-matrix least squares on  $F^2$  (SHELXL 2015)<sup>1</sup>:  $\text{C}_{50}\text{H}_{46}\text{NO}_6\text{PW}$ ,  $M_r = 671.70$ , crystal dimensions  $0.18 \times 0.12 \times 0.04 \text{ mm}^3$ , monoclinic, space group  $P2_1/n$ ,  $Z = 4$ ,  $a = 13.3276(15) \text{ \AA}$ ,  $b = 19.649(2) \text{ \AA}$ ,  $c = 18.692(2) \text{ \AA}$ ,  $\alpha = 90^\circ$ ,  $\beta = 107.734(4)^\circ$ ,  $\gamma = 90^\circ$ ,  $V = 4662.3(9) \text{ \AA}^3$ ,  $d_{\text{calcd}} = 1.384 \text{ g cm}^{-3}$ ,  $\mu = 2.559 \text{ mm}^{-1}$ , transmission factors (min/max) 0.4106/0.6478, empirical absorption correction,  $2\theta_{\text{max}} = 51.996^\circ$ , no. of unique data 8792,  $R_{\text{int}} = 0.0524$ ,  $R_1$  (for  $I > 2\sigma(I)$ ) = 0.0659,  $wR_2$  (for all data) = 0.1631, final  $R_1 = 0.1077$ , goodness of fit 1.101,  $\Delta F$  (max/min) =  $4.33 / -2.54 \text{ e \AA}^{-3}$ . CCDC 1529745 contains the supplementary crystallographic data for this paper. The data can be obtained free of charge from The Cambridge Crystallographic Data Centre via [www.ccdc.cam.ac.uk/structures](http://www.ccdc.cam.ac.uk/structures).

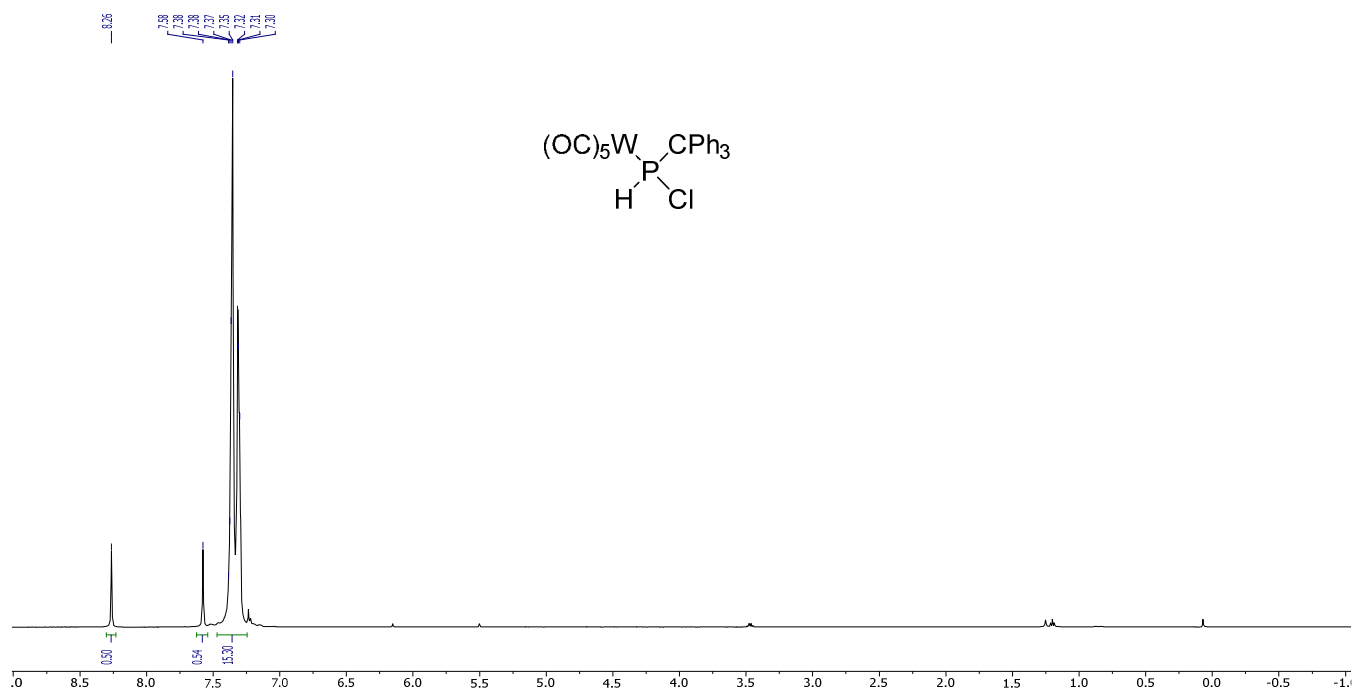

Figure S47:  $^1H$  NMR spectrum of **19** in  $CDCl_3$  at 500.2 MHz.

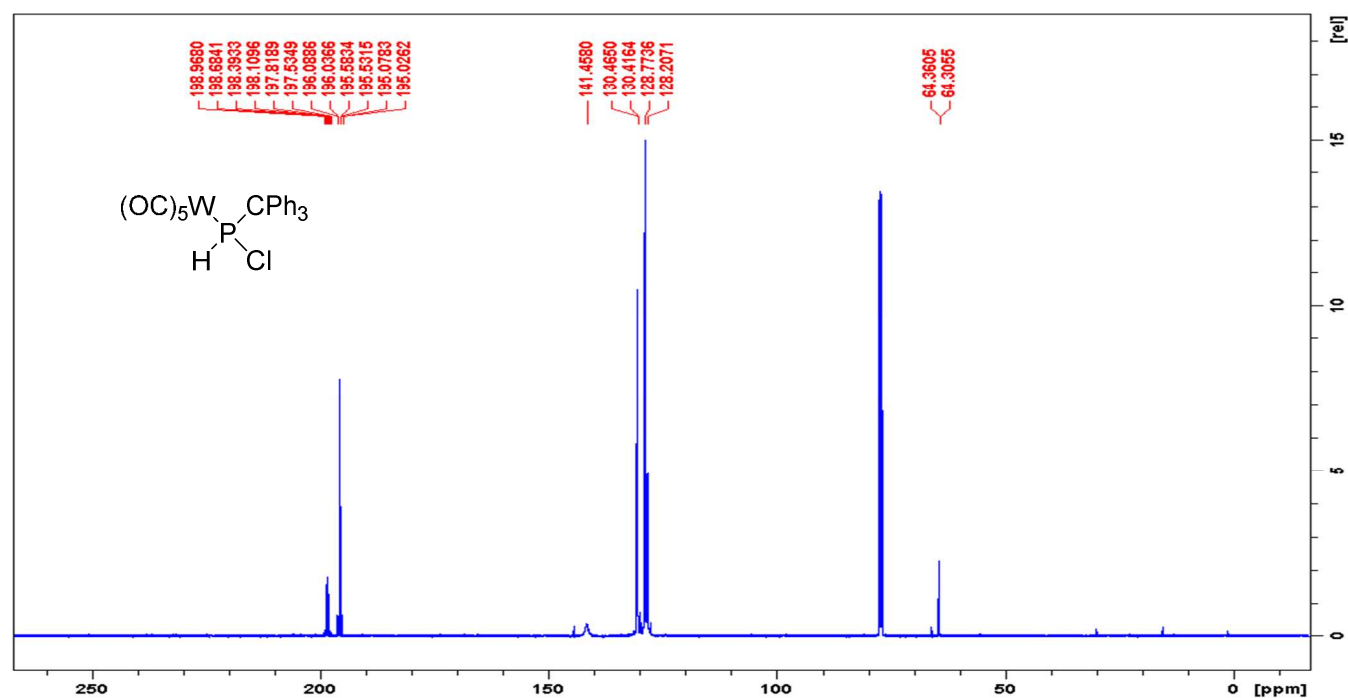

Figure S48:  $^{13}C\{^1H\}$  NMR spectrum of **19** in  $CDCl_3$  at 125.8 MHz.

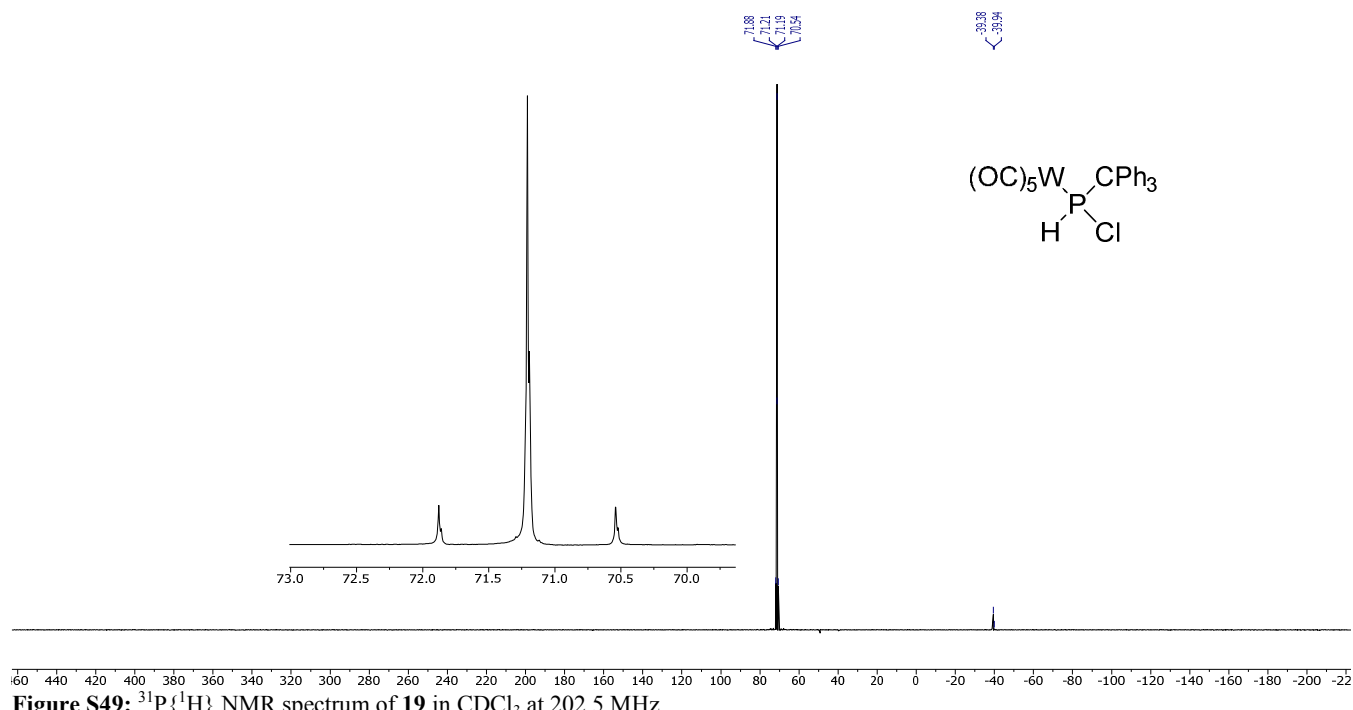

**Figure S49:**  $^{31}\text{P}\{^1\text{H}\}$  NMR spectrum of **19** in  $\text{CDCl}_3$  at 202.5 MHz.

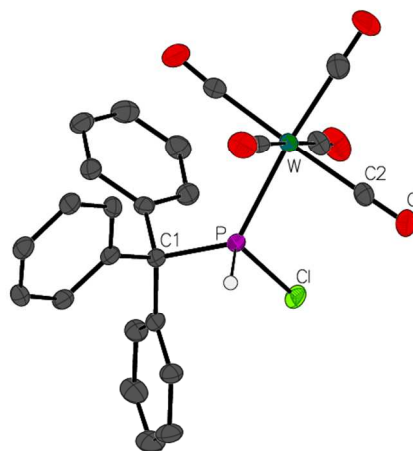

**Figure S50:** Crystal structure of **19**. Suitable single-crystals of **19** were obtained from a concentrated diethyl ether solution at 4 °C. Data were collected with a Nonius KappaCCD diffractometer equipped with a low-temperature device at 123 K by using graphite-monochromated Mo  $K\alpha$  radiation ( $\lambda = 0.71073 \text{ \AA}$ ). The structure was solved by intrinsic phasing methods (SHELXT 2015) and refined by full-matrix least squares on  $F^2$  (SHELXL 2015)<sup>1</sup>:  $\text{C}_{24}\text{H}_{16}\text{ClO}_5\text{PW}$ , Mr = 634.64, crystal dimensions  $0.6 \times 0.6 \times 0.12 \text{ mm}^3$ , triclinic, space group P-1, Z = 2,  $a = 9.6127(4) \text{ \AA}$ ,  $b = 10.5143(4) \text{ \AA}$ ,  $c = 11.6185(5) \text{ \AA}$ ,  $\alpha = 90.087(2)^\circ$ ,  $\beta = 97.409(1)^\circ$ ,  $\gamma = 94.466(1)^\circ$ ,  $V = 1160.87(8) \text{ \AA}^3$ ,  $d_{\text{calcd}} = 1.816 \text{ g cm}^{-3}$ ,  $\mu = 5.192 \text{ mm}^{-1}$ , transmission factors (min/max) 0.3907/0.6478, multi-scan absorption correction,  $2\theta_{\text{max}} = 55.992^\circ$ , no. of unique data 5574,  $R_{\text{int}} = 0.0304$ ,  $R_1$  (for  $I > 2\sigma(I)$ ) = 0.0259,  $wR_2$  (for all data) = 0.0714, final  $R_1 = 0.0294$ , goodness of fit 1.052,  $\Delta F$  (max/min) =  $1.97 / -1.65 \text{ e \AA}^{-3}$ . CCDC 1529746 contains the supplementary crystallographic data for this paper. The data can be obtained free of charge from The Cambridge Crystallographic Data Centre via [www.ccdc.cam.ac.uk/structures](http://www.ccdc.cam.ac.uk/structures).
